# Supplementary material for: Illiciumlignans G–O from the leaves of Illicium dunnianum and their anti-inflammatory activities
Source: Royal Society of Chemistry journal article supplement (doi:10.1039/d1ra03520g), 2021-01-01
Supplement: d1ra03520g1.pdf [file d1ra03520g1.pdf]

**Illiciumlignans G-O from the leaves of *Illicium dunnianum* and their  
anti-inflammatory activities**

Sen-Ju Ma,<sup>‡, a</sup> Hai-Bo Li,<sup>‡, b</sup> Ting Li,<sup>a</sup> Zhen-zhen Su,<sup>b</sup> Zhen-Zhong Wang,<sup>b</sup> Xin-Sheng Yao<sup>\*,a</sup> Wei Xiao,<sup>\*,b</sup> and Yang Yu,<sup>\*,a</sup>

<sup>‡</sup> These authors have contributed equally to this work

## List of supporting information

|                                                                          |    |
|--------------------------------------------------------------------------|----|
| Fig. S1 HR-ESI-MS spectrum of compound 1.....                            | 4  |
| Fig. S2 <sup>1</sup> H NMR spectrum of compound 1 .....                  | 4  |
| Fig. S3 <sup>13</sup> C NMR spectrum of compound 1 .....                 | 5  |
| Fig. S4 <sup>13</sup> C-NMR and DEPT 135 spectra of compound 1.....      | 5  |
| Fig. S5 <sup>1</sup> H- <sup>1</sup> H COSY spectrum of compound 1.....  | 6  |
| Fig. S6 HSQC spectrum of compound 1.....                                 | 6  |
| Fig. S7 HMBC spectrum of compound 1.....                                 | 7  |
| Fig. S8 NOESY spectrum of compound 1.....                                | 7  |
| Fig. S9 Experimental CD spectrum of compound 1 .....                     | 8  |
| Fig. S10 HR-ESI-MS spectrum of compound 2.....                           | 8  |
| Fig. S11 <sup>1</sup> H NMR spectrum of compound 2.....                  | 9  |
| Fig. S12 <sup>13</sup> C NMR spectrum of compound 2 .....                | 9  |
| Fig. S13 <sup>13</sup> C-NMR and DEPT 135 spectra of compound 2.....     | 10 |
| Fig. S14 <sup>1</sup> H- <sup>1</sup> H COSY spectrum of compound 2..... | 10 |
| Fig. S15 HSQC spectrum of compound 2.....                                | 11 |
| Fig. S16 HMBC spectrum of compound 2.....                                | 11 |
| Fig. S17 NOESY spectrum of compound 2.....                               | 12 |
| Fig. S18 Experimental CD spectrum of compound 2 .....                    | 12 |
| Fig. S19 HR-ESI-MS spectrum of compound 3.....                           | 13 |
| Fig. S20 <sup>1</sup> H NMR spectrum of compound 3.....                  | 13 |
| Fig. S21 <sup>13</sup> C NMR spectrum of compound 3 .....                | 14 |
| Fig. S22 <sup>13</sup> C-NMR and DEPT 135 spectra of compound 3 .....    | 14 |
| Fig. S23 <sup>1</sup> H- <sup>1</sup> H COSY spectrum of compound 3..... | 15 |
| Fig. S24 HSQC spectrum of compound 3.....                                | 15 |
| Fig. S25 HMBC spectrum of compound 3.....                                | 16 |
| Fig. S26 NOESY spectrum of compound 3.....                               | 16 |
| Fig. S27 Experimental CD spectrum of compound 3 .....                    | 17 |
| Fig. S28 HR-ESI-MS spectrum of compound 4.....                           | 17 |
| Fig. S29 <sup>1</sup> H NMR spectrum of compound 4.....                  | 18 |
| Fig. S30 <sup>13</sup> C NMR spectrum of compound 4 .....                | 18 |
| Fig. S31 <sup>13</sup> C-NMR and DEPT 135 spectra of compound 4.....     | 19 |
| Fig. S32 <sup>1</sup> H- <sup>1</sup> H COSY spectrum of compound 4..... | 19 |
| Fig. S33 HSQC spectrum of compound 4.....                                | 20 |
| Fig. S34 HMBC spectrum of compound 4.....                                | 20 |
| Fig. S35 NOESY spectrum of compound 4.....                               | 21 |
| Fig. S36 Experimental CD spectrum of compound 4 .....                    | 21 |
| Fig. S37 HR-ESI-MS spectrum of compound 5.....                           | 22 |
| Fig. S38 <sup>1</sup> H NMR spectrum of compound 5.....                  | 22 |
| Fig. S39 <sup>13</sup> C NMR spectrum of compound 5 .....                | 23 |
| Fig. S40 <sup>13</sup> C-NMR and DEPT 135 spectra of compound 5.....     | 23 |
| Fig. S41 <sup>1</sup> H- <sup>1</sup> H COSY spectrum of compound 5..... | 24 |
| Fig. S42 HSQC spectrum of compound 5.....                                | 24 |

|                                                                                                   |    |
|---------------------------------------------------------------------------------------------------|----|
| Fig. S43 HMBC spectrum of compound 5.....                                                         | 25 |
| Fig. S44 NOESY spectrum of compound 5.....                                                        | 25 |
| Fig. S45 HR-ESI-MS spectrum of compound 6.....                                                    | 26 |
| Fig. S46 <sup>1</sup> H NMR spectrum of compound 6.....                                           | 26 |
| Fig. S47 <sup>13</sup> C NMR spectrum of compound 6 .....                                         | 27 |
| Fig. S48 <sup>13</sup> C-NMR and DEPT 135 spectra of compound 6 .....                             | 27 |
| Fig. S49 <sup>1</sup> H- <sup>1</sup> H COSY spectrum of compound 6.....                          | 28 |
| Fig. S50 HSQC spectrum of compound 6.....                                                         | 28 |
| Fig. S51 HMBC spectrum of compound 6.....                                                         | 29 |
| Fig. S52 NOESY spectrum of compound 6.....                                                        | 29 |
| Fig. S53 HR-ESI-MS spectrum of compound 7.....                                                    | 30 |
| Fig. S54 <sup>1</sup> H NMR spectrum of compound 7.....                                           | 30 |
| Fig. S55 <sup>13</sup> C NMR spectrum of compound 7 .....                                         | 31 |
| Fig. S56 <sup>13</sup> C-NMR and DEPT 135 spectra of compound 7 .....                             | 31 |
| Fig. S57 <sup>1</sup> H- <sup>1</sup> H COSY spectrum of compound 7.....                          | 32 |
| Fig. S58 HSQC spectrum of compound 7.....                                                         | 32 |
| Fig. S59 HMBC spectrum of compound 7.....                                                         | 33 |
| Fig. S60 NOESY spectrum of compound 7.....                                                        | 33 |
| Fig. S61 HR-ESI-MS spectrum of compound 8.....                                                    | 34 |
| Fig. S62 <sup>1</sup> H NMR spectrum of compound 8.....                                           | 34 |
| Fig. S63 <sup>13</sup> C NMR spectrum of compound 8 .....                                         | 35 |
| Fig. S64 <sup>13</sup> C-NMR and DEPT 135 spectra of compound 8.....                              | 35 |
| Fig. S65 <sup>1</sup> H- <sup>1</sup> H COSY spectrum of compound 8.....                          | 36 |
| Fig. S66 HSQC spectrum of compound 8.....                                                         | 36 |
| Fig. S67 HMBC spectrum of compound 8.....                                                         | 37 |
| Fig. S68 NOESY spectrum of compound 8.....                                                        | 37 |
| Fig. S69 Experimental CD spectrum of compound 8 .....                                             | 38 |
| Fig. S70 HR-ESI-MS spectrum of compound 9.....                                                    | 38 |
| Fig. S71 <sup>1</sup> H NMR spectrum of compound 9.....                                           | 39 |
| Fig. S72 <sup>13</sup> C NMR spectrum of compound 9 .....                                         | 39 |
| Fig. S73 <sup>13</sup> C-NMR and DEPT 135 spectra of compound 9 .....                             | 40 |
| Fig. S74 <sup>1</sup> H- <sup>1</sup> H COSY spectrum of compound 9.....                          | 40 |
| Fig. S75 HSQC spectrum of compound 9.....                                                         | 41 |
| Fig. S76 HMBC spectrum of compound 9.....                                                         | 41 |
| Fig. S77 NOESY spectrum of compound 9.....                                                        | 42 |
| Fig. S78 Experimental CD spectrum of compound 9 .....                                             | 42 |
| Fig. S79 Chiral-phase HPLC analytical chromatograms of compound 5.....                            | 43 |
| Fig. S80 Chiral-phase HPLC analytical chromatograms of compound 6.....                            | 43 |
| Fig. S81 Chiral-phase HPLC analytical chromatograms of compound 7.....                            | 43 |
| Fig. S82 HPLC chromatograph for the derivative of compound 1-4, 8-9.....                          | 44 |
| Fig. S83 Effect of compounds 12 and 20 on PGE2 production in LPS-stimulated RAW264.7 cells .....  | 44 |
| Fig. S84 Effect of compounds 16,17 and 20 on NO production in LPS-stimulated RAW264.7 cells ..... | 44 |

## Single Mass Analysis

Tolerance = 3.0 PPM / DBE: min = -20.0, max = 50.0

Element prediction: Off

Number of isotope peaks used for i-FIT = 3

Monoisotopic Mass, Even Electron Ions

349 formula(e) evaluated with 1 results within limits (all results (up to 1000) for each mass)

Elements Used:

C: 0-70 H: 0-100 O: 0-20 Na: 0-1

ID-3L4D

20200113003 37 (0.311)

1: TOF MS ES+  
2.66e+005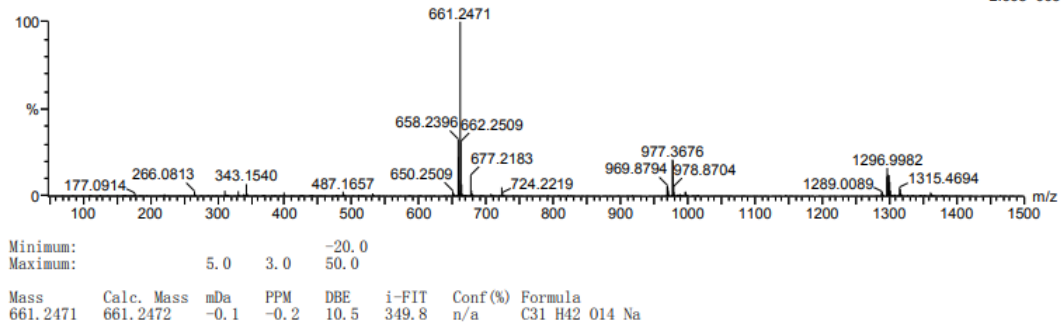

Fig. S1 HR-ESI-MS spectrum of compound 1

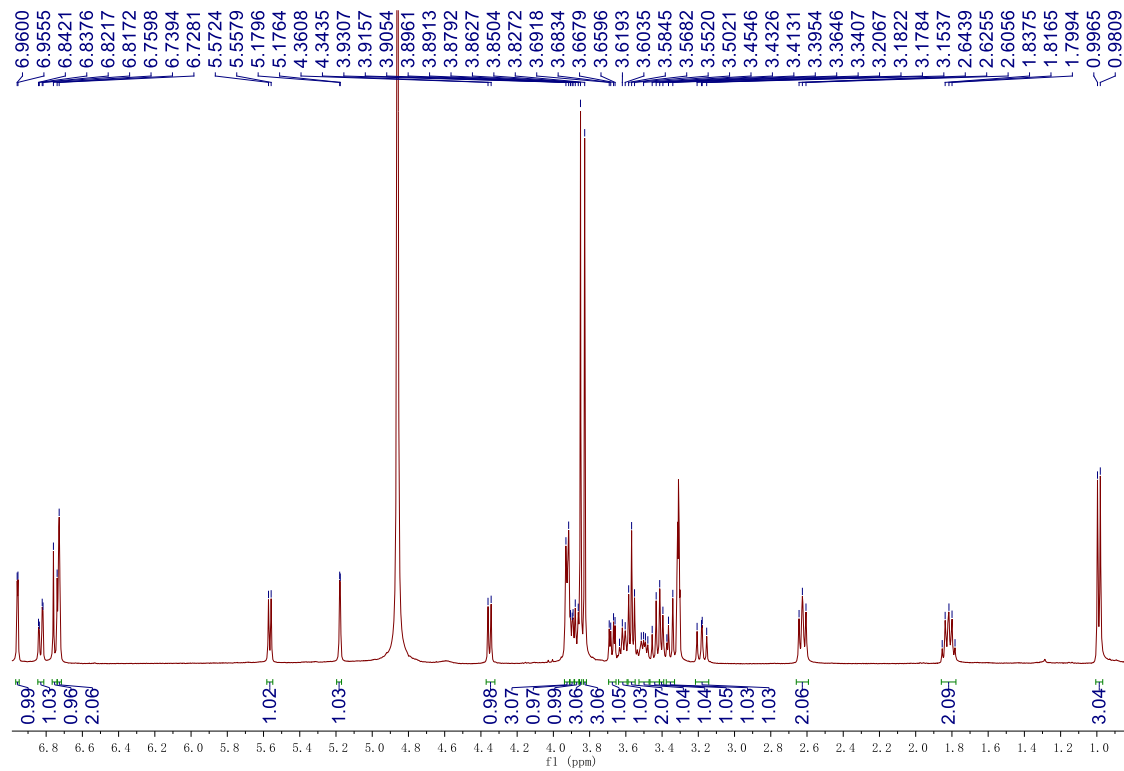Fig. S2 <sup>1</sup>H NMR spectrum of compound 1

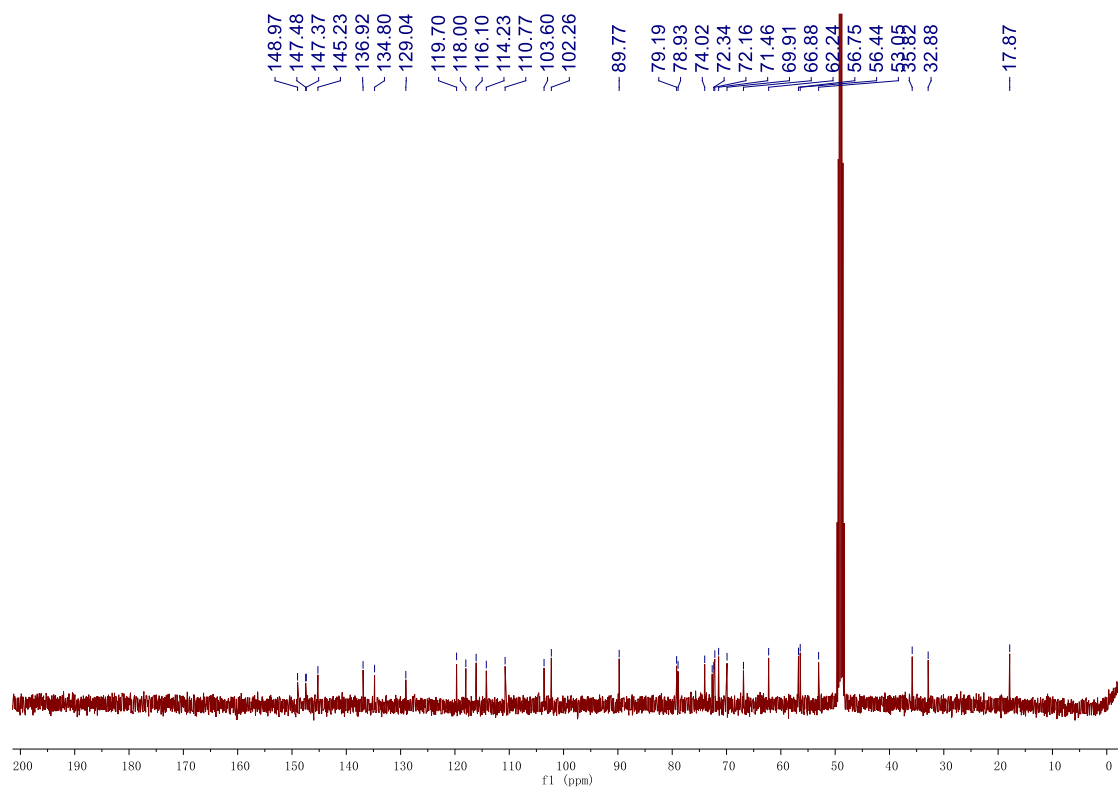

**Fig. S3  $^{13}\text{C}$  NMR spectrum of compound 1**

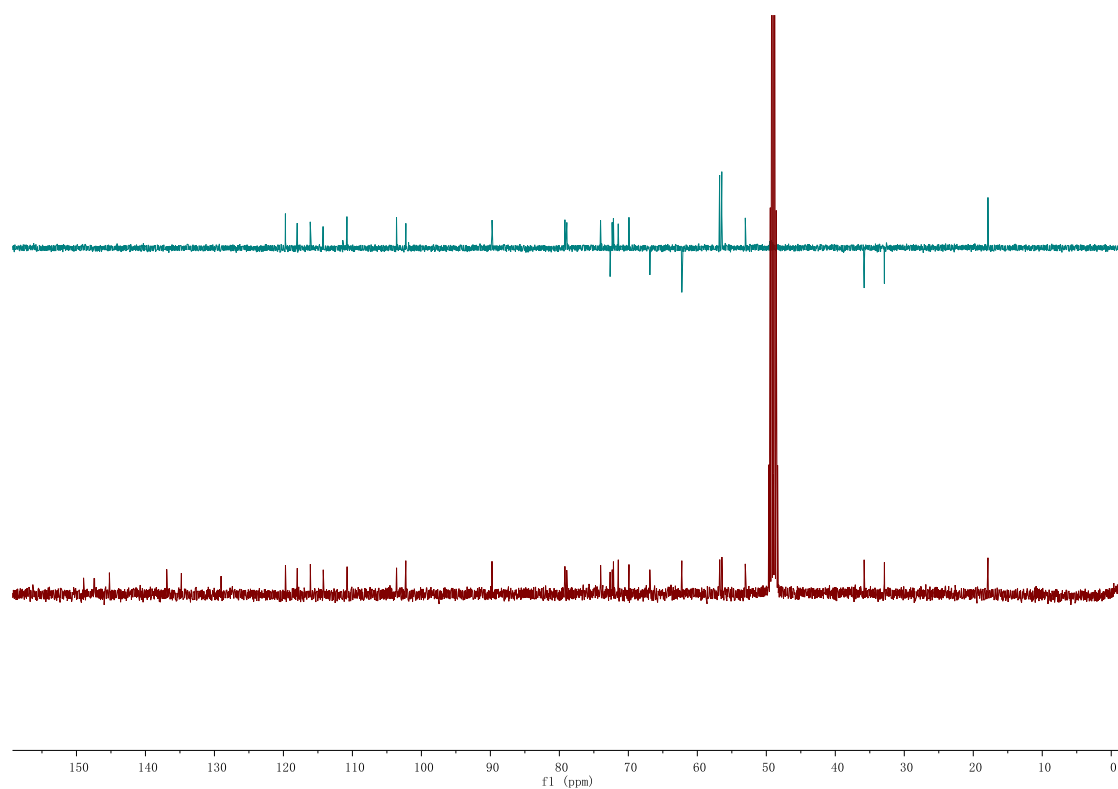

**Fig. S4  $^{13}\text{C}$ -NMR and DEPT 135 spectra of compound 1**

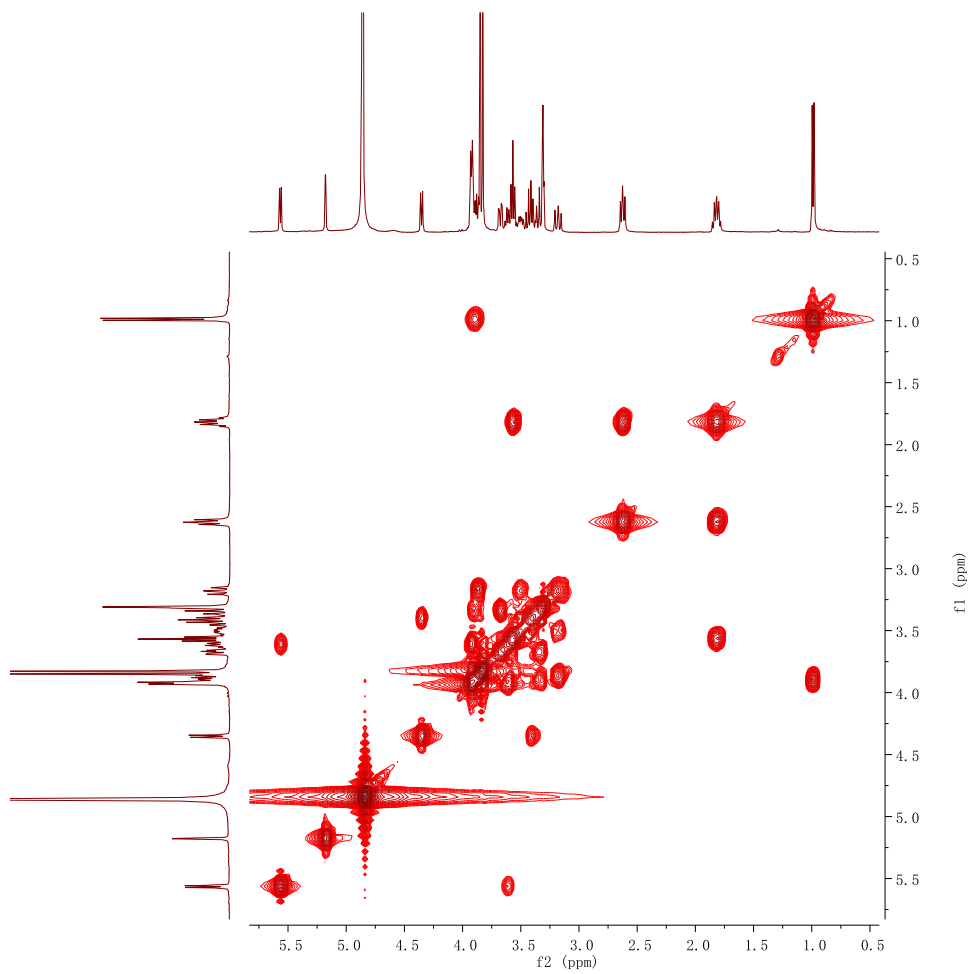

**Fig. S5  $^1\text{H}$ - $^1\text{H}$  COSY spectrum of compound 1**

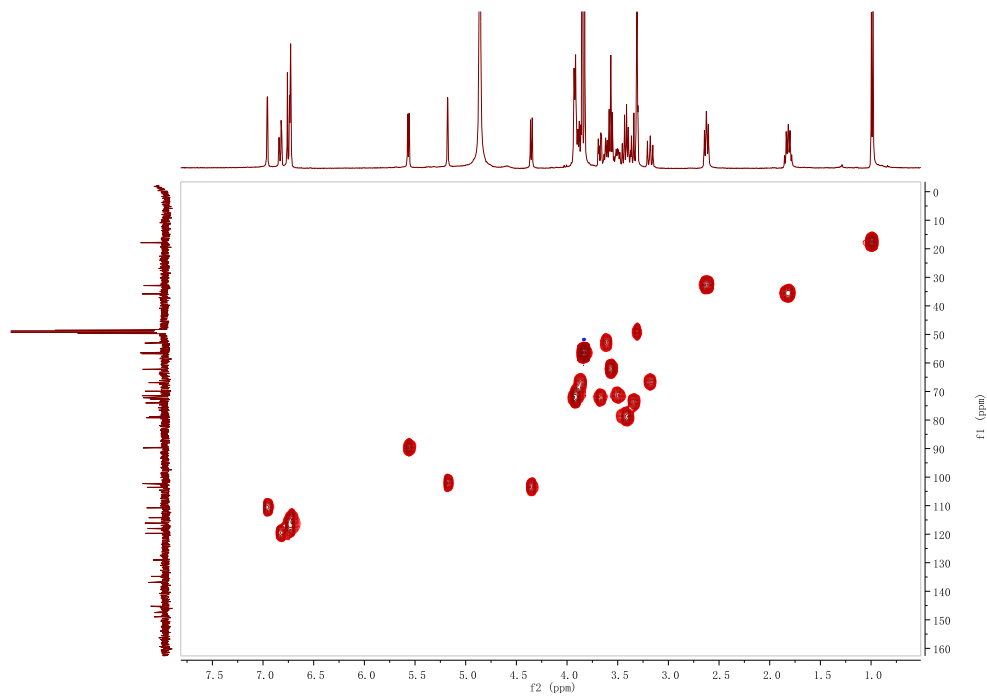

**Fig. S6 HSQC spectrum of compound 1**

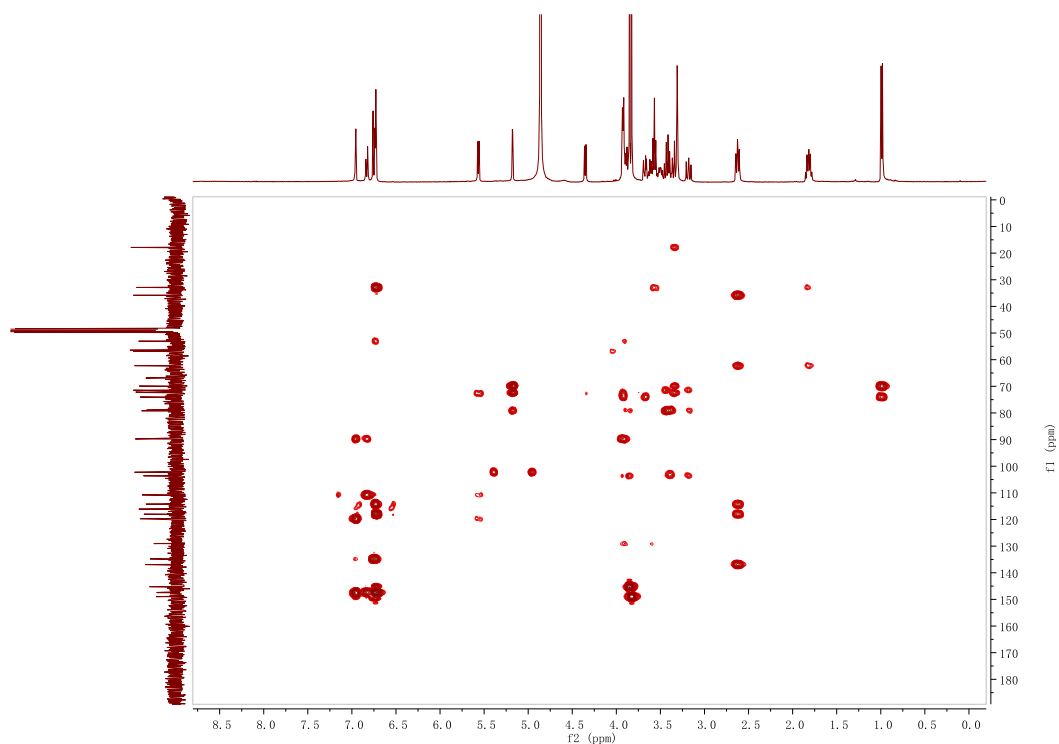

**Fig. S7 HMBC spectrum of compound 1**

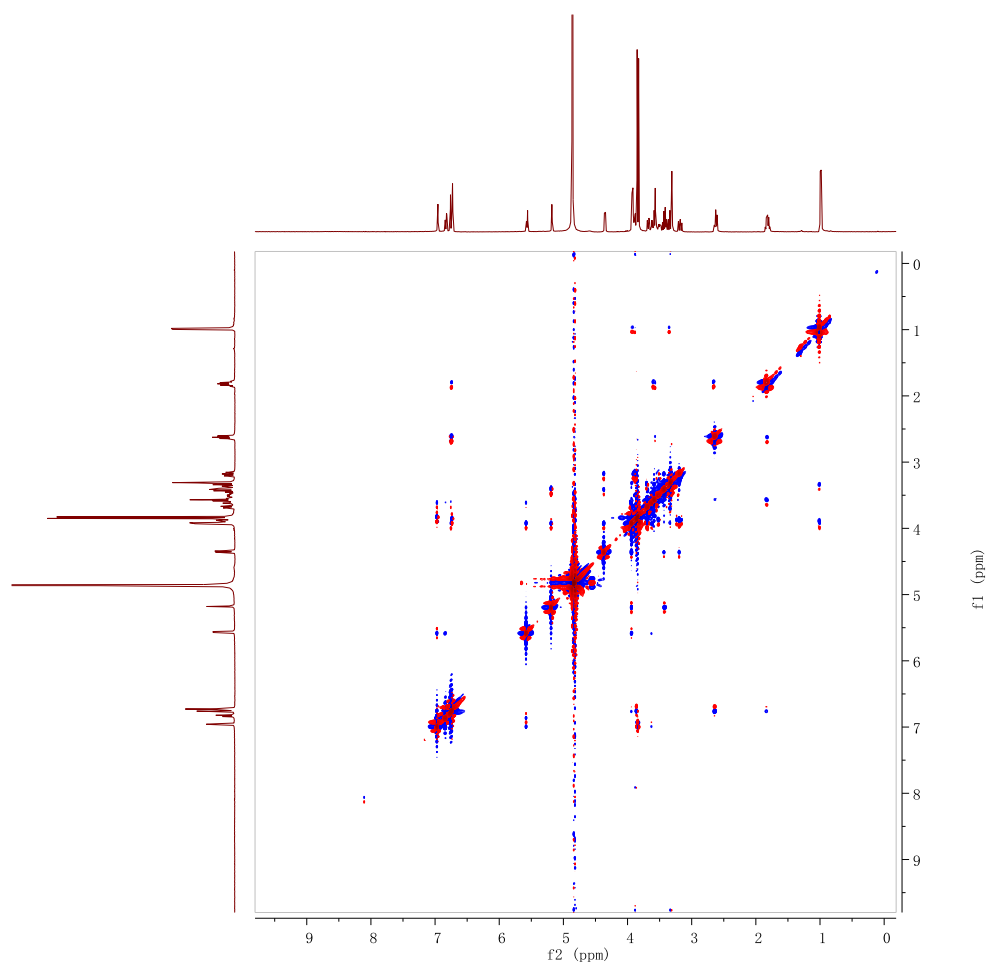

**Fig. S8 NOESY spectrum of compound 1**

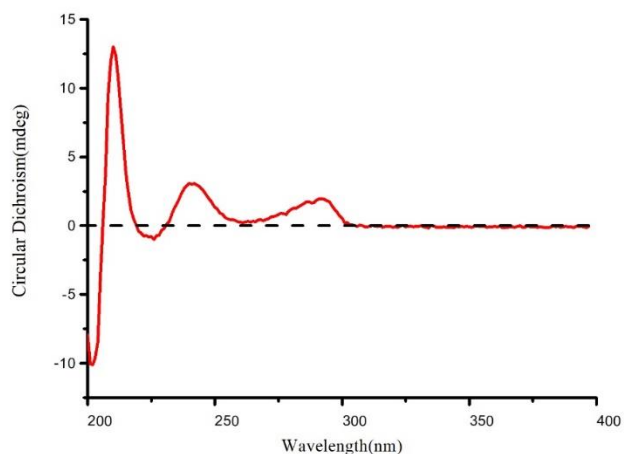

Fig. S9 Experimental CD spectrum of compound 1

Elemental Composition Report

Page 1

Single Mass Analysis

Tolerance = 5.0 PPM / DBE: min = -1.5, max = 50.0

Element prediction: Off

Number of isotope peaks used for i-FIT = 3

Monoisotopic Mass, Even Electron Ions

392 formula(e) evaluated with 3 results within limits (up to 60 closest results for each mass)

Elements Used:

C: 0-70 H: 0-200 O: 0-40 Na: 0-1

ID-3L4A1

20200824002 41 (0.341)

1: TOF MS ES+  
4.46e+004

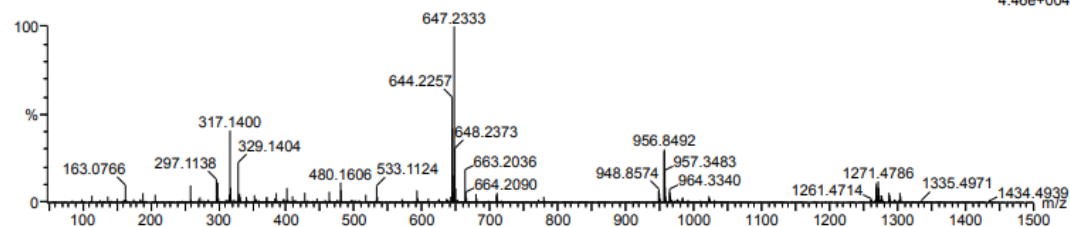

Minimum: -1.5  
Maximum: 5.0 5.0 50.0

| Mass     | Calc. Mass | mDa  | PPM  | DBE  | i-FIT | Conf(%) | Formula        |
|----------|------------|------|------|------|-------|---------|----------------|
| 647.2333 | 647.2340   | -0.7 | -1.1 | 13.5 | 264.8 | 12.91   | C32 H39 O14    |
|          | 647.2316   | 1.7  | 2.6  | 10.5 | 262.9 | 87.08   | C30 H40 O14 Na |
|          | 647.2351   | -1.8 | -2.8 | 32.5 | 271.9 | 0.01    | C48 H32 O Na   |

Fig. S10 HR-ESI-MS spectrum of compound 2



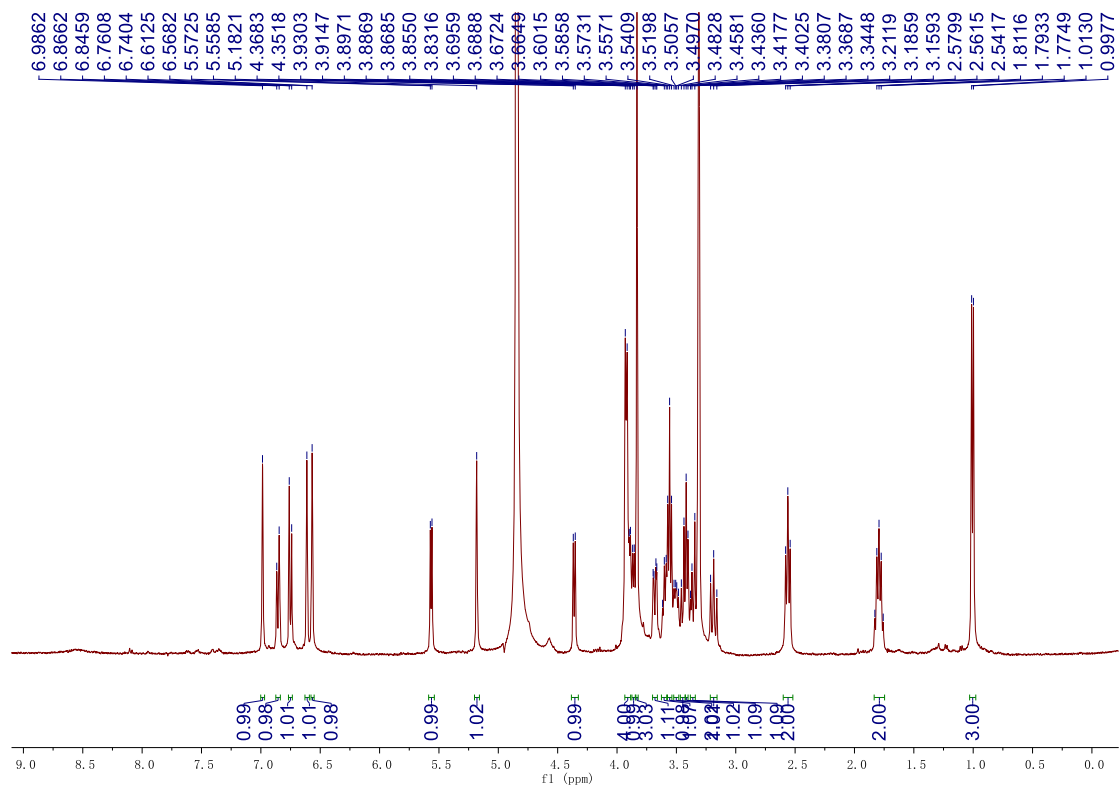

Fig. S11  $^1\text{H}$  NMR spectrum of compound 2

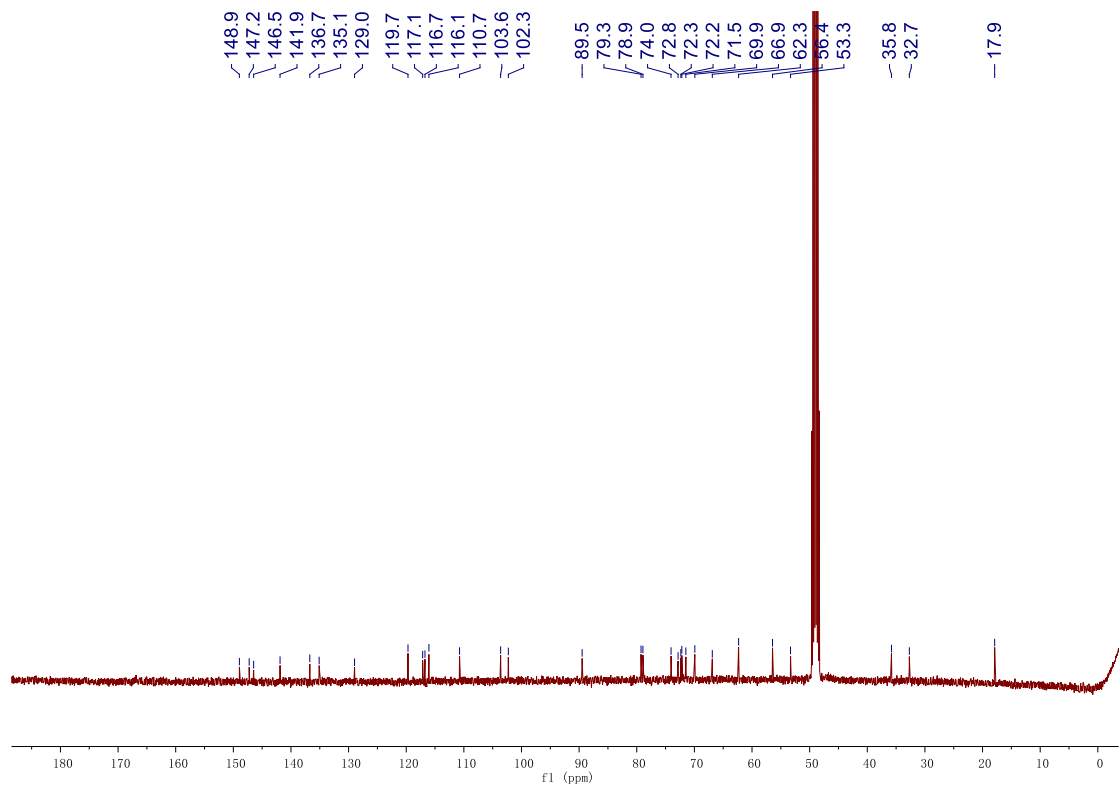

Fig. S12  $^{13}\text{C}$  NMR spectrum of compound 2

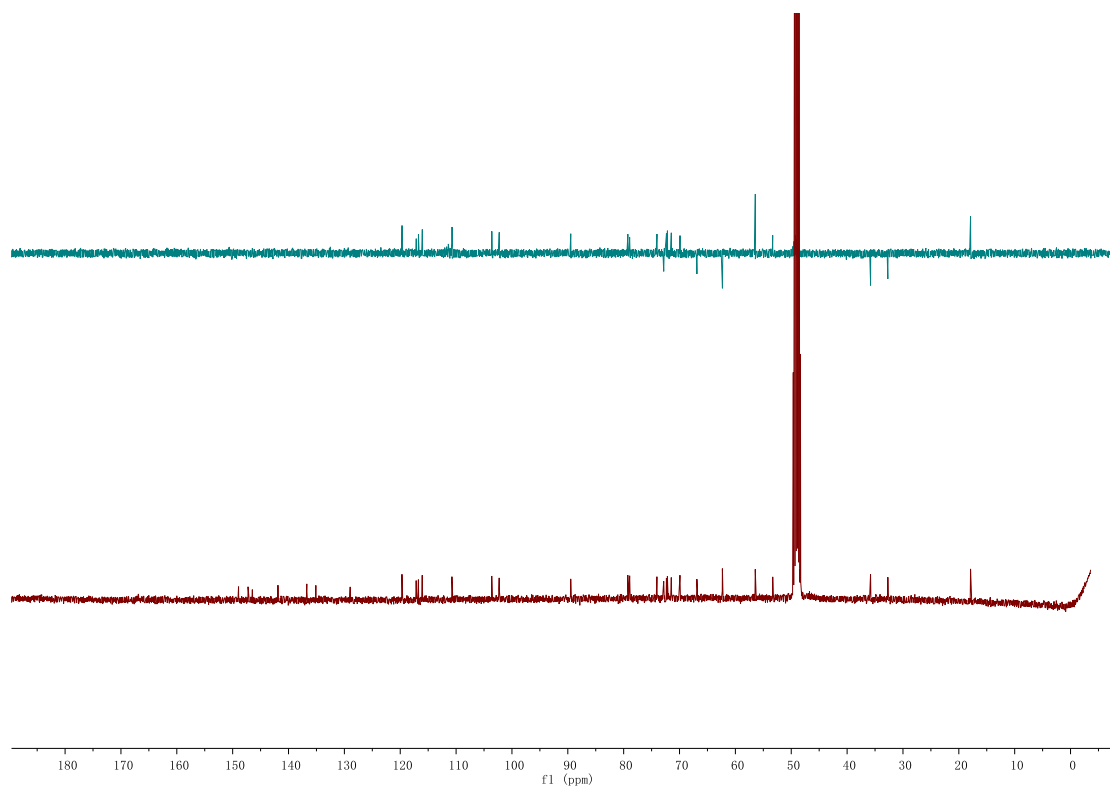

**Fig. S13**  $^{13}\text{C}$ -NMR and DEPT 135 spectra of compound 2

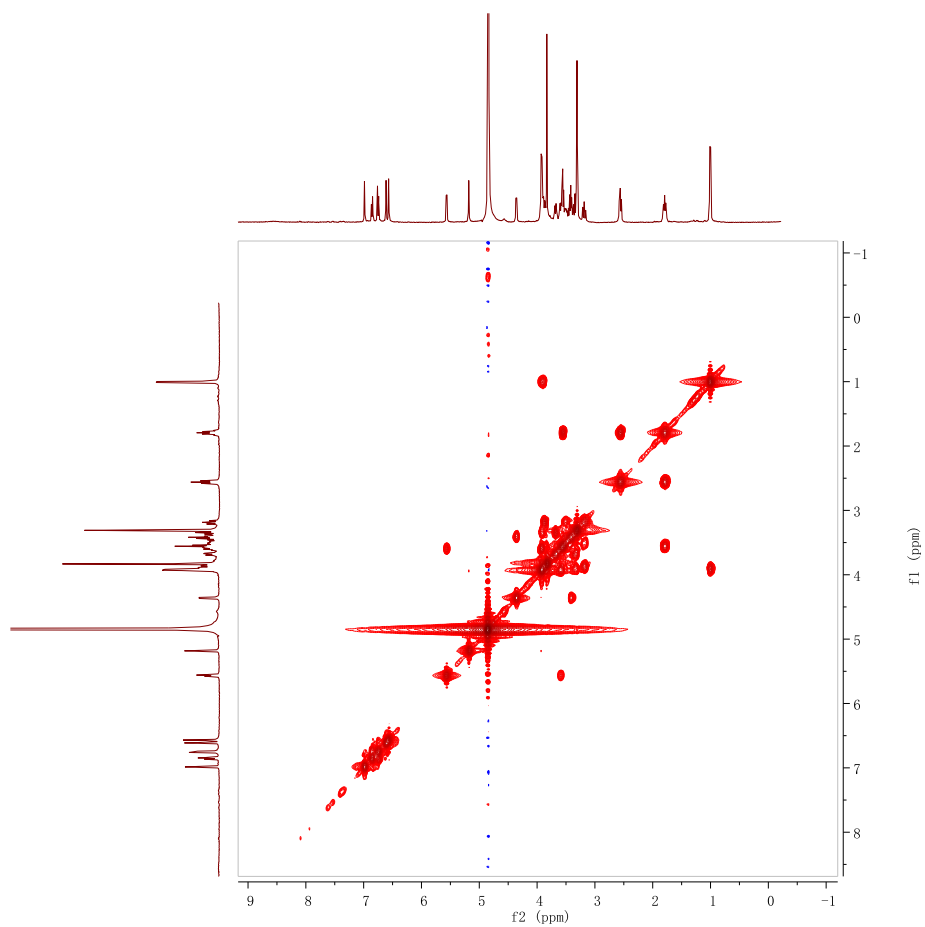

**Fig. S14**  $^1\text{H}$ - $^1\text{H}$  COSY spectrum of compound 2

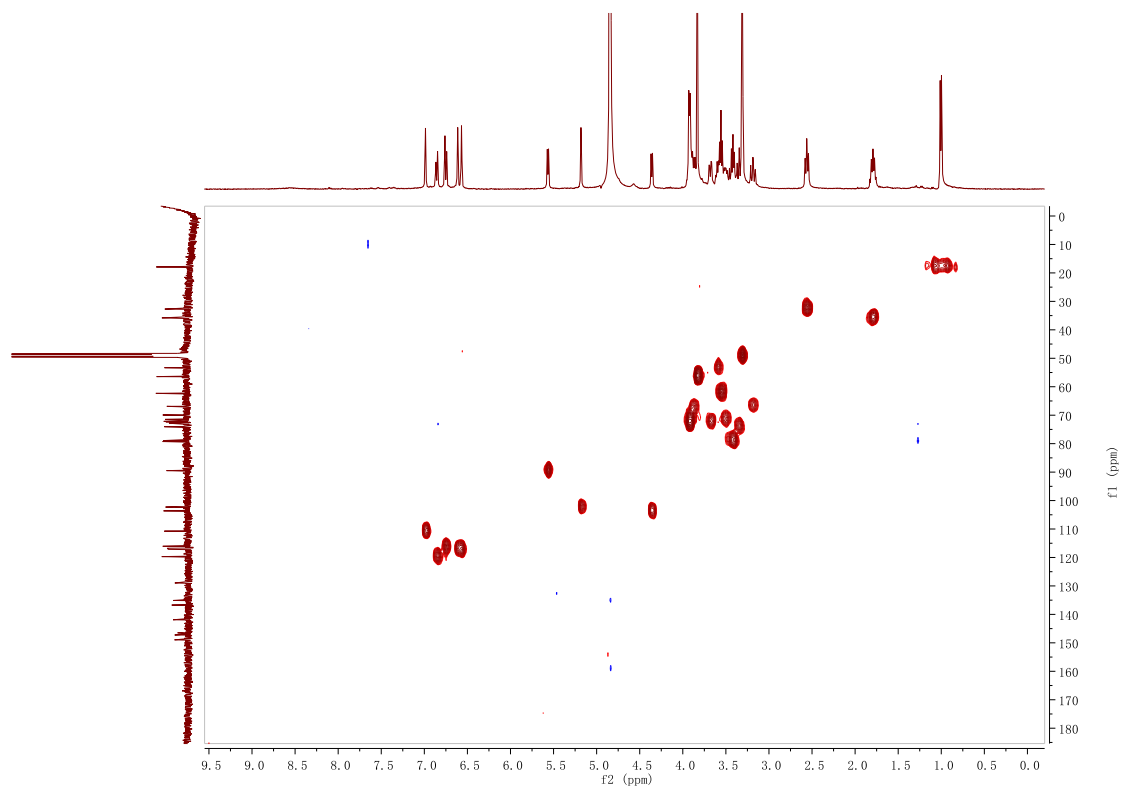

**Fig. S15 HSQC spectrum of compound 2**

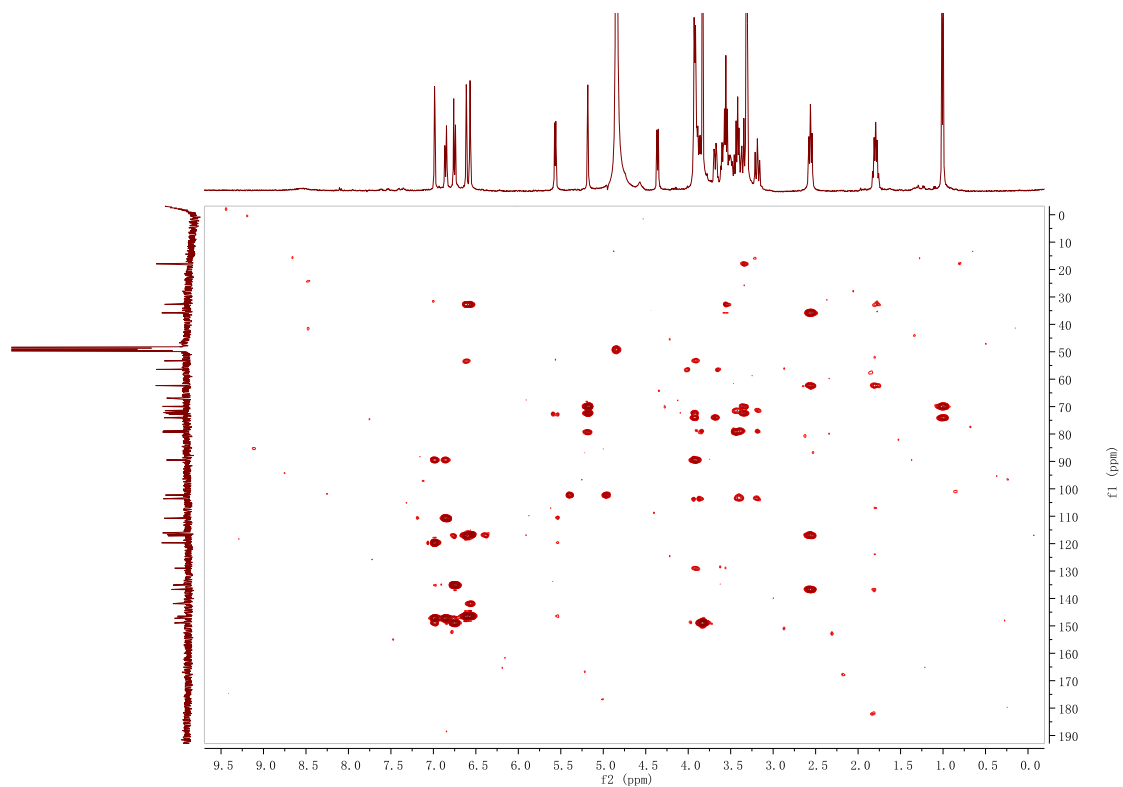

**Fig. S16 HMBC spectrum of compound 2**

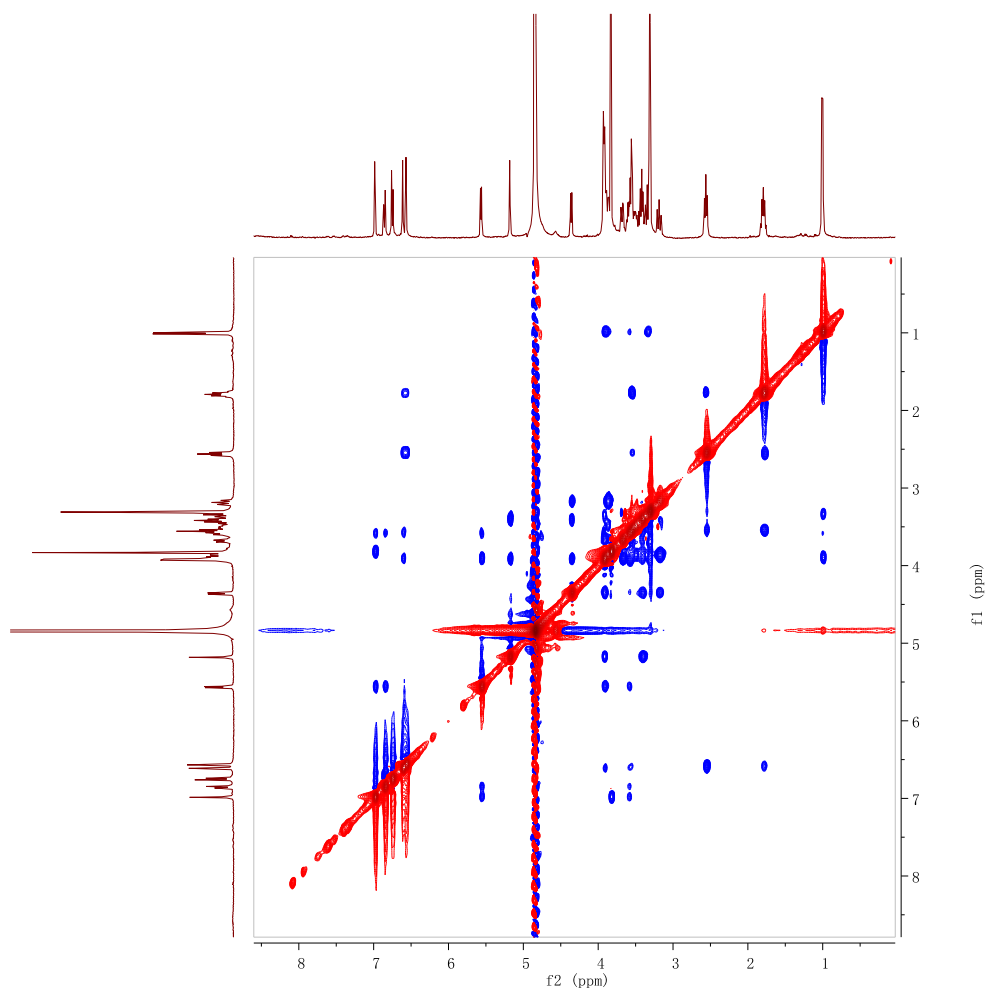

**Fig. S17 NOESY spectrum of compound 2**

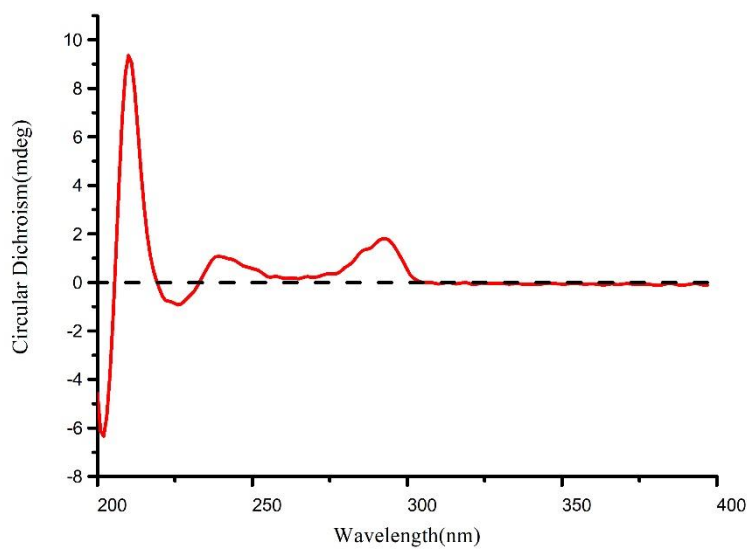

**Fig. S18 Experimental CD spectrum of compound 2**

## Single Mass Analysis

Tolerance = 5.0 PPM / DBE: min = -1.5, max = 50.0

Element prediction: Off

Number of isotope peaks used for i-FIT = 3

Monoisotopic Mass, Even Electron Ions

392 formula(e) evaluated with 3 results within limits (up to 60 closest results for each mass)

Elements Used:

C: 0-70 H: 0-200 O: 0-40 Na: 0-1

ID-3L4A5A

20200824007 40 (0.333)

1: TOF MS ES+  
4.81e+004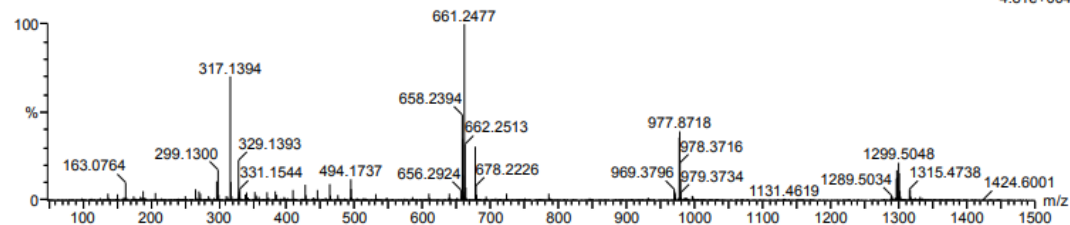

Minimum: -1.5  
Maximum: 5.0 5.0 50.0

| Mass     | Calc. Mass | mDa  | PPM  | DBE  | i-FIT | Conf (%) | Formula        |
|----------|------------|------|------|------|-------|----------|----------------|
| 661.2477 | 661.2472   | 0.5  | 0.8  | 10.5 | 251.3 | 93.36    | C31 H42 O14 Na |
|          | 661.2496   | -1.9 | -2.9 | 13.5 | 254.0 | 6.62     | C33 H41 O14    |
|          | 661.2507   | -3.0 | -4.5 | 32.5 | 260.1 | 0.01     | C49 H34 O Na   |

Fig. S19 HR-ESI-MS spectrum of compound 3

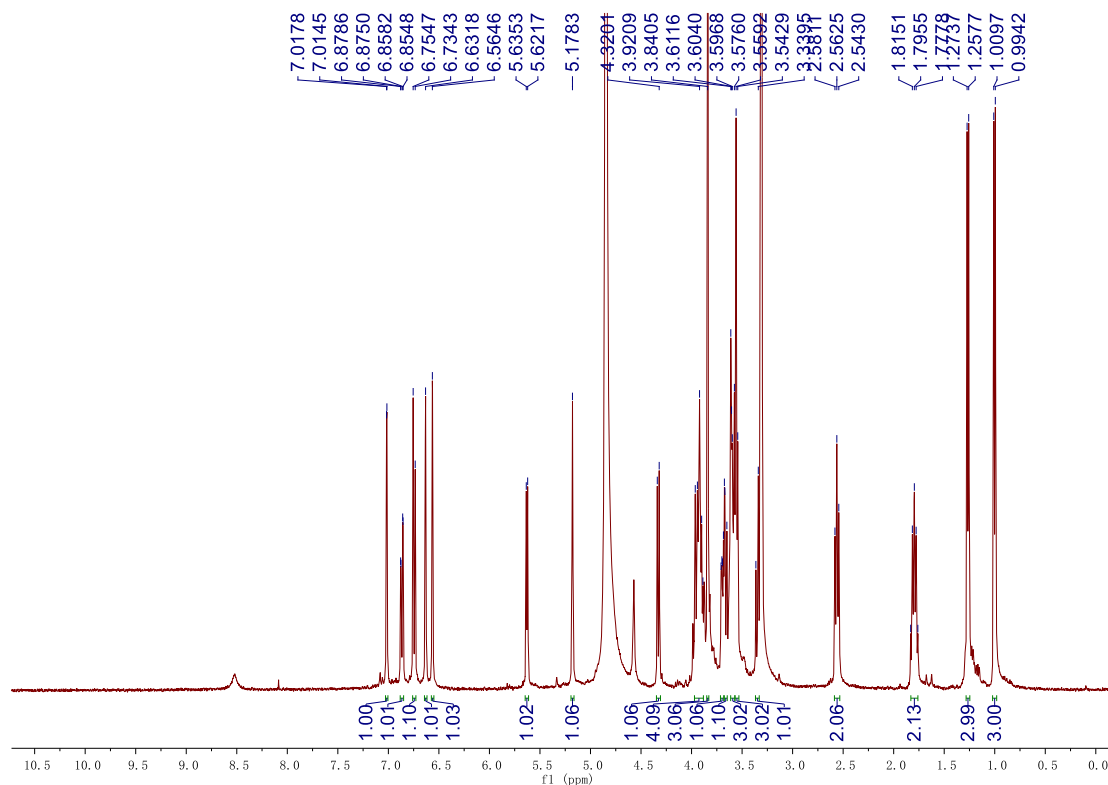Fig. S20 <sup>1</sup>H NMR spectrum of compound 3

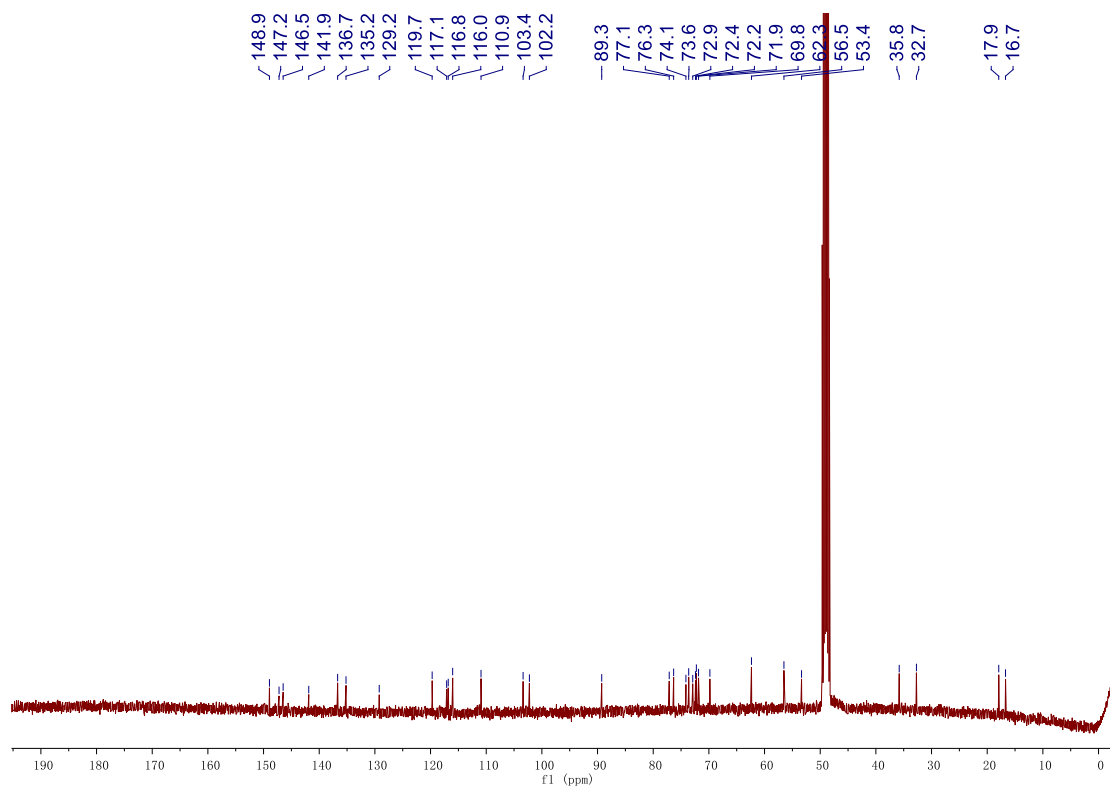

**Fig. S21**  $^{13}\text{C}$  NMR spectrum of compound **3**

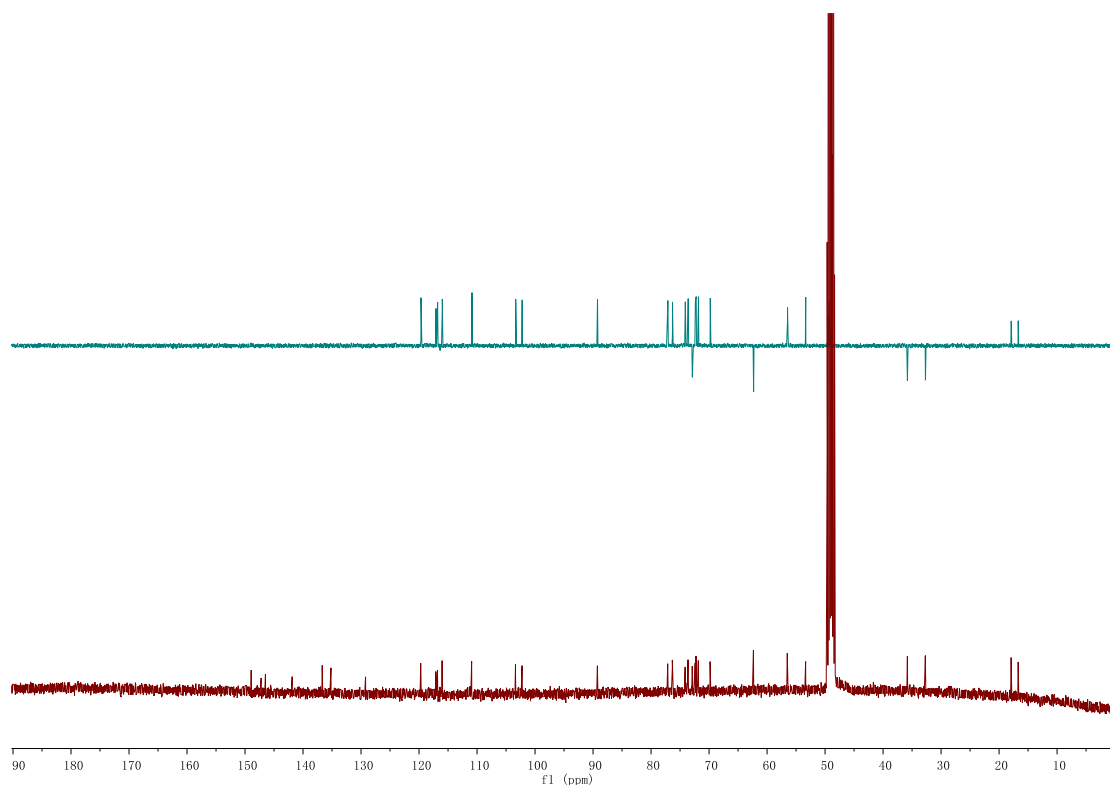

**Fig. S22**  $^{13}\text{C}$ -NMR and DEPT 135 spectra of compound **3**

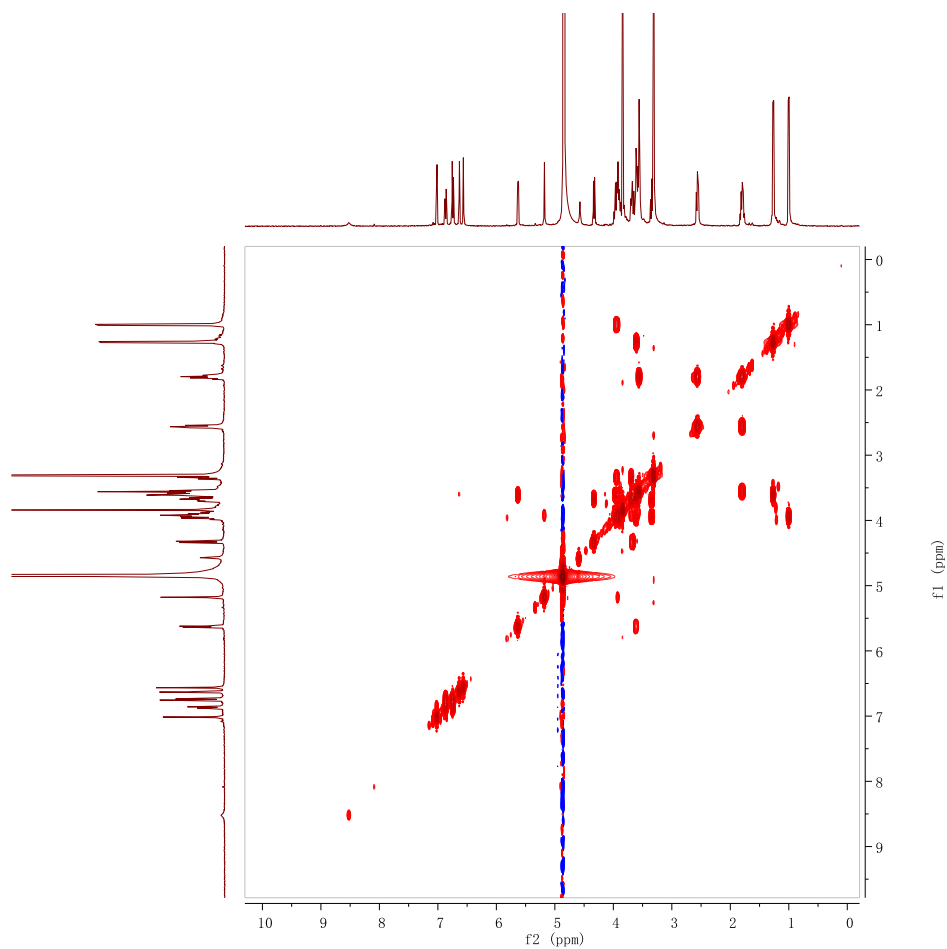

**Fig. S23  $^1\text{H}$ - $^1\text{H}$  COSY spectrum of compound 3**

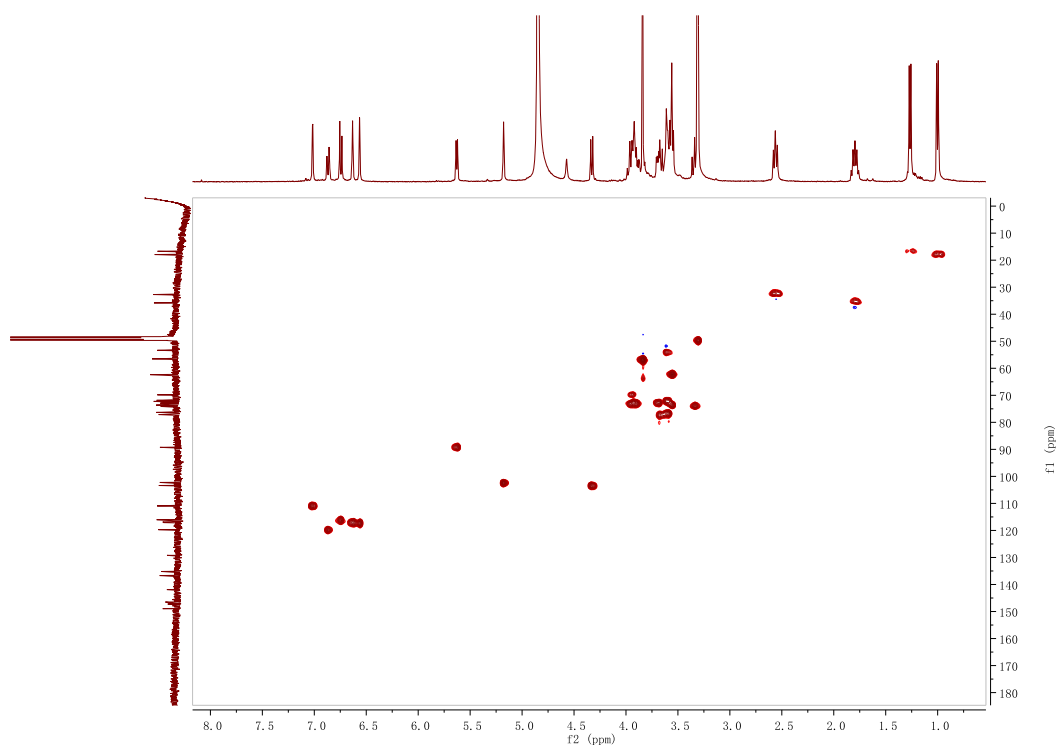

**Fig. S24 HSQC spectrum of compound 3**

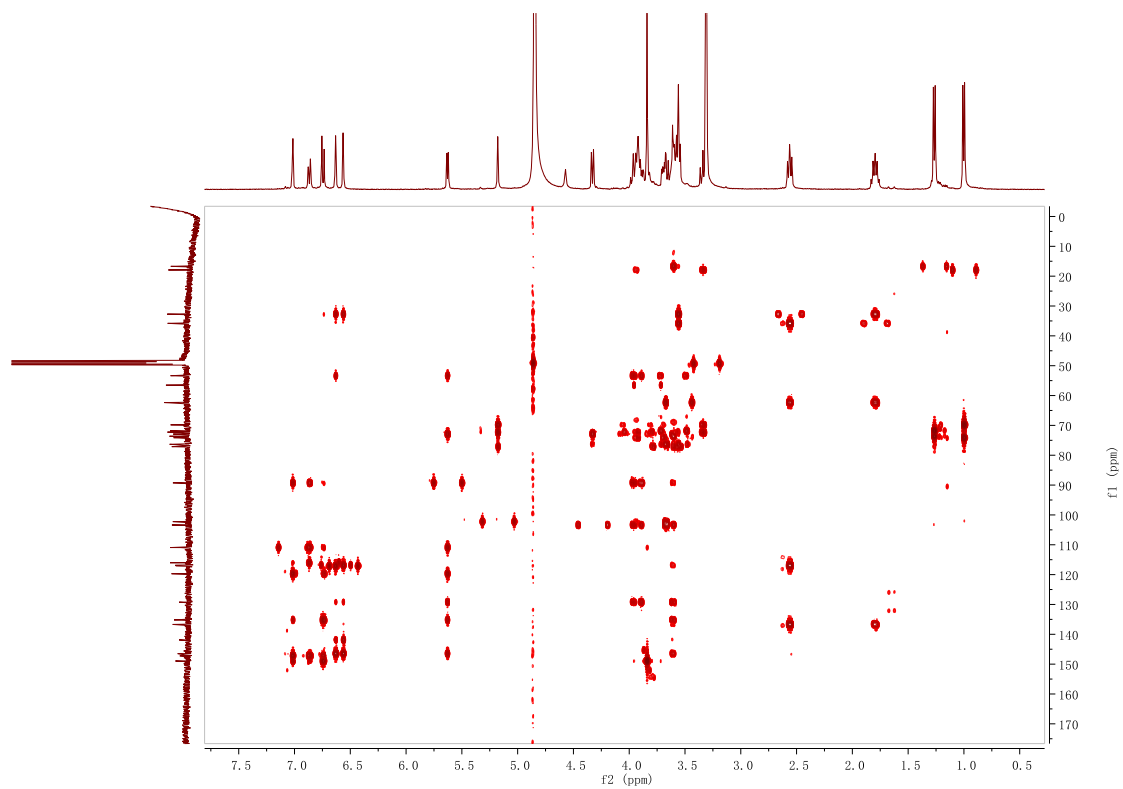

**Fig. S25 HMBC spectrum of compound 3**

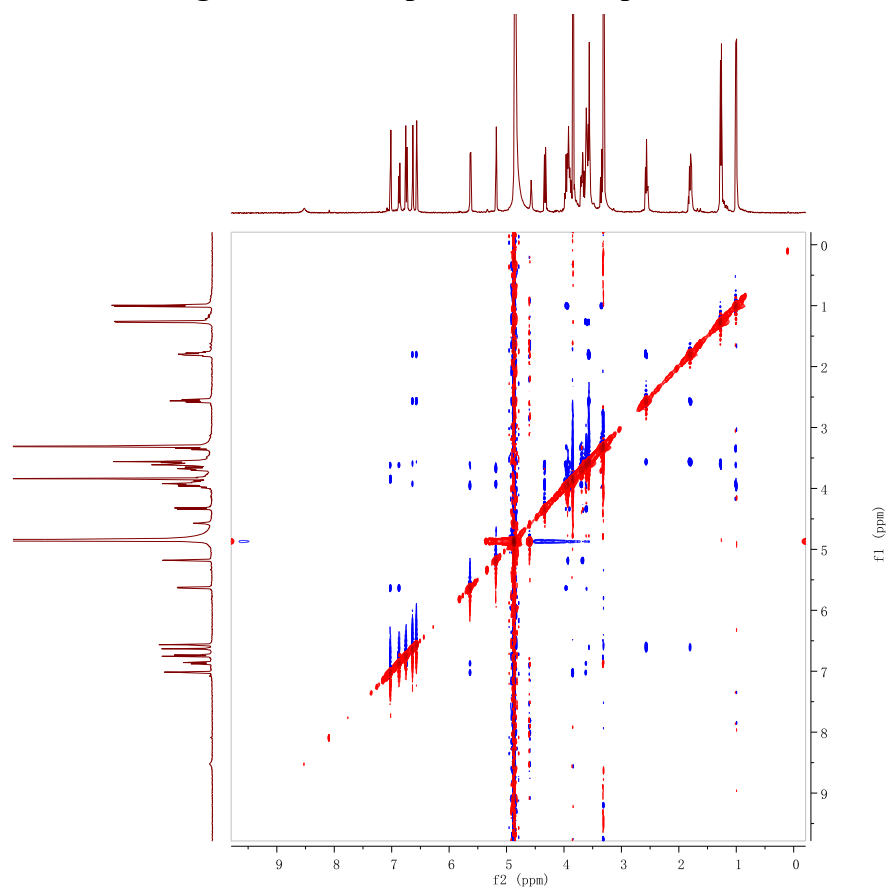

**Fig. S26 NOESY spectrum of compound 3**



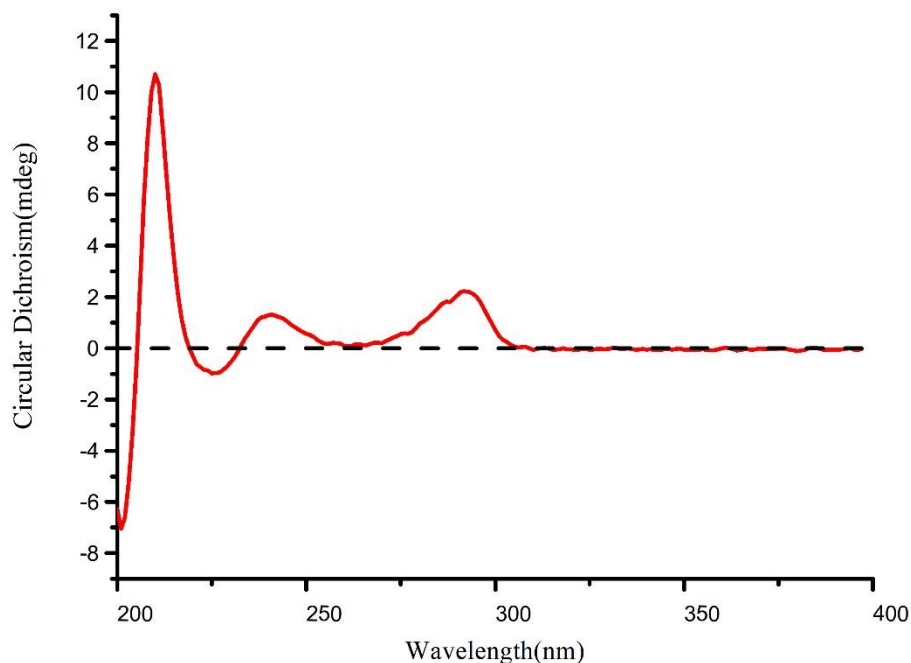

Fig. S27 Experimental CD spectrum of compound 3

Elemental Composition Report

Page 1

Single Mass Analysis

Tolerance = 5.0 PPM / DBE: min = -1.5, max = 50.0

Element prediction: Off

Number of isotope peaks used for i-FIT = 3

Monoisotopic Mass, Even Electron Ions

408 formula(e) evaluated with 3 results within limits (up to 60 closest results for each mass)

Elements Used:

C: 0-70 H: 0-100 O: 0-40 Na: 0-1

ID-3L4A7

20200824003 40 (0.333)

1: TOF MS ES+  
1.08e+005

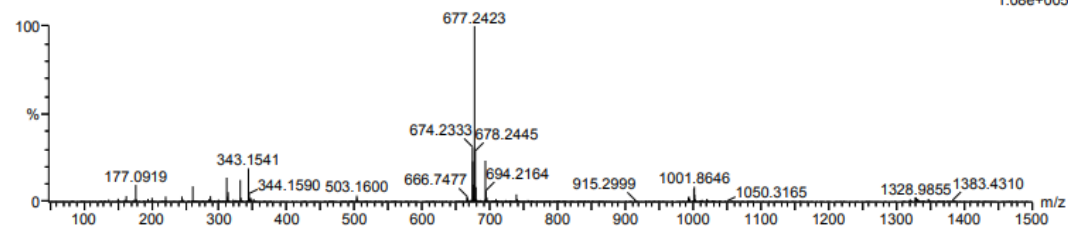

| Mass     | Calc. Mass | mDa  | PPM  | DBE  | i-FIT | Conf (%) | Formula        |
|----------|------------|------|------|------|-------|----------|----------------|
| 677.2423 | 677.2421   | 0.2  | 0.3  | 10.5 | 317.9 | 95.18    | C31 H42 O15 Na |
|          | 677.2445   | -2.2 | -3.2 | 13.5 | 320.8 | 4.79     | C33 H41 O15    |
|          | 677.2456   | -3.3 | -4.9 | 32.5 | 326.1 | 0.02     | C49 H34 O2 Na  |

Fig. S28 HR-ESI-MS spectrum of compound 4

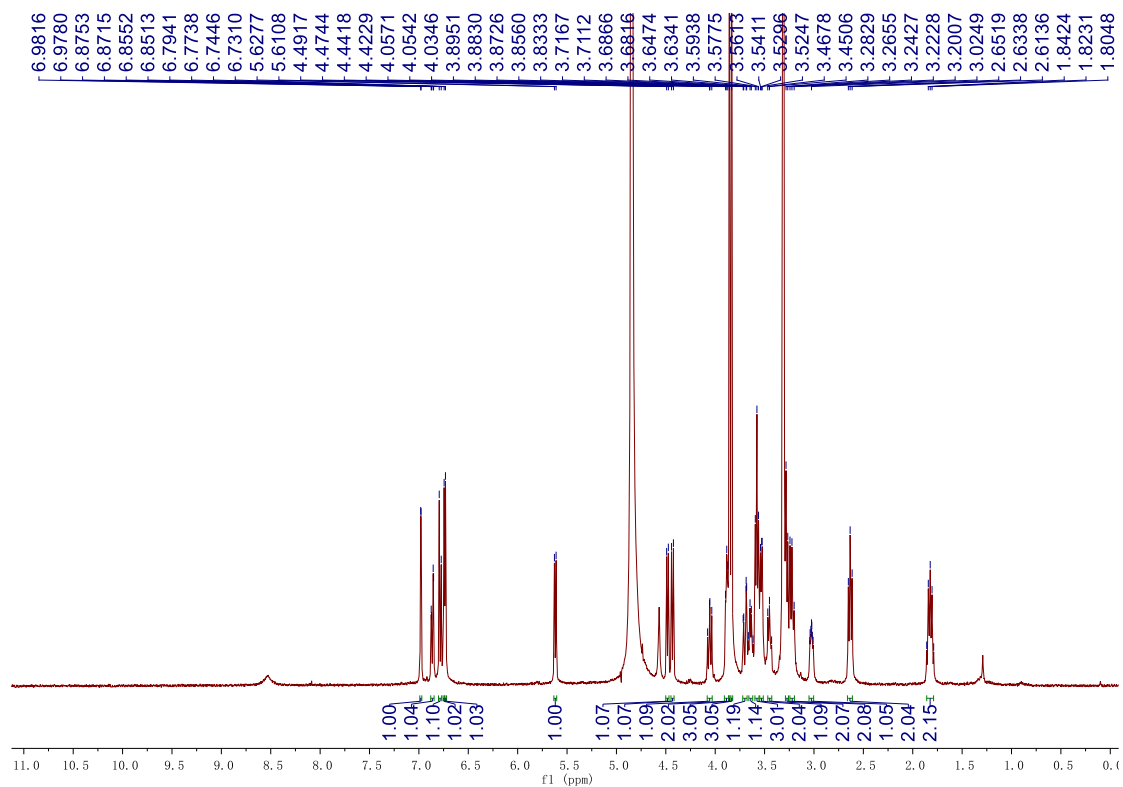

**Fig. S29  $^1\text{H}$  NMR spectrum of compound 4**

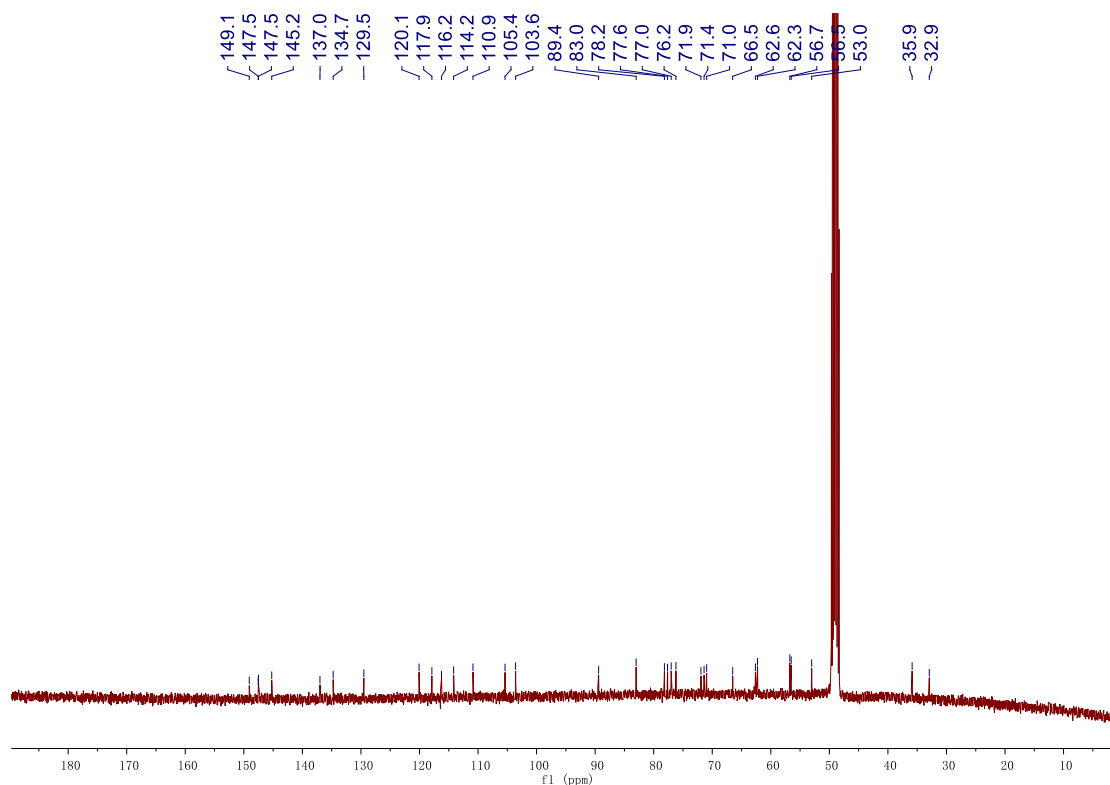

**Fig. S30  $^{13}\text{C}$  NMR spectrum of compound 4**

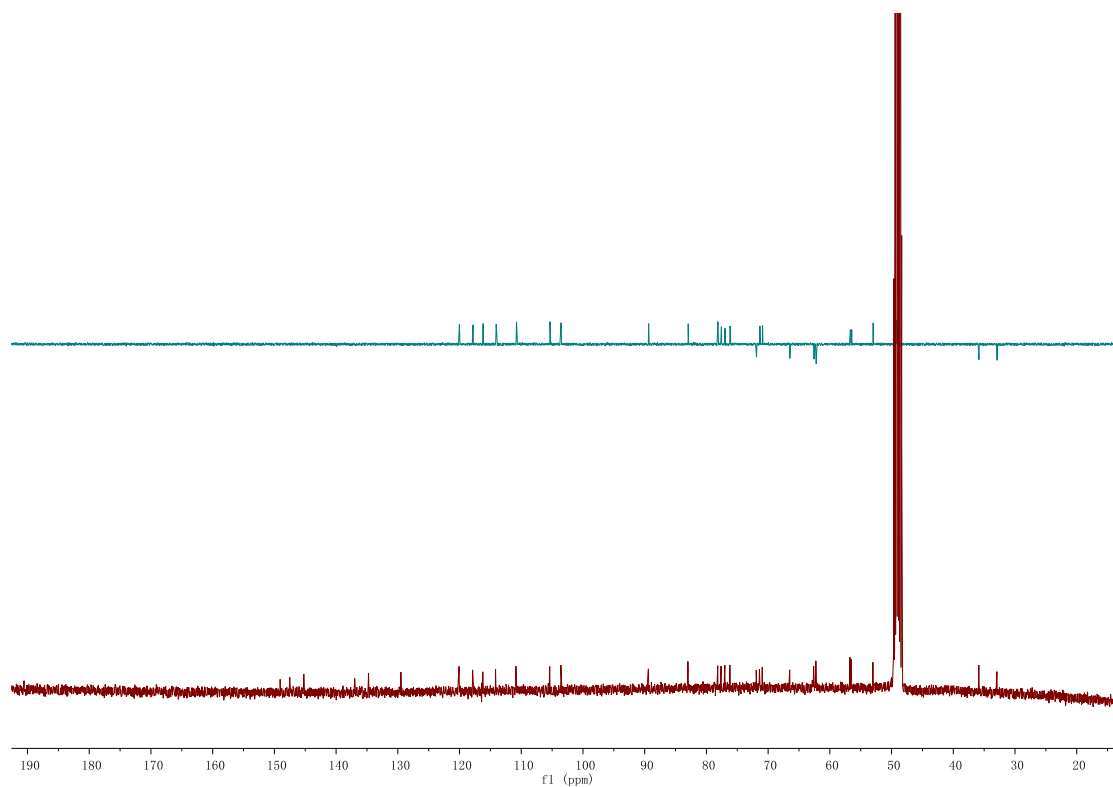

**Fig. S31  $^{13}\text{C}$ -NMR and DEPT 135 spectra of compound 4**

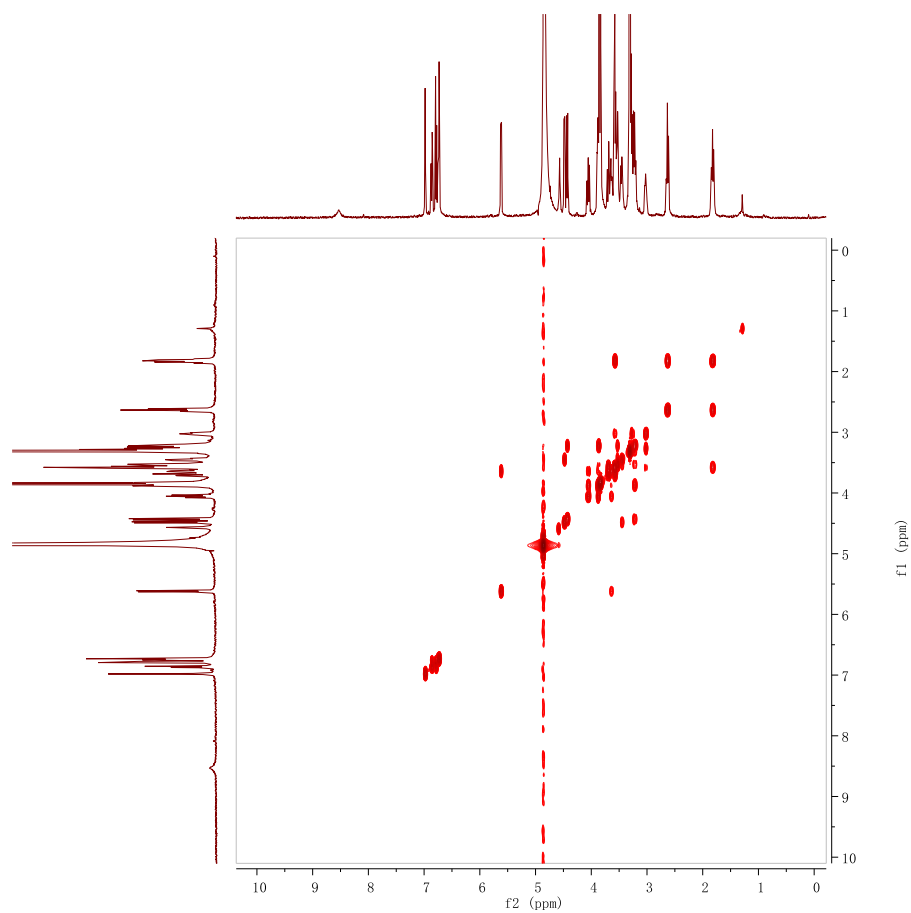

**Fig. S32  $^1\text{H}$ - $^1\text{H}$  COSY spectrum of compound 4**

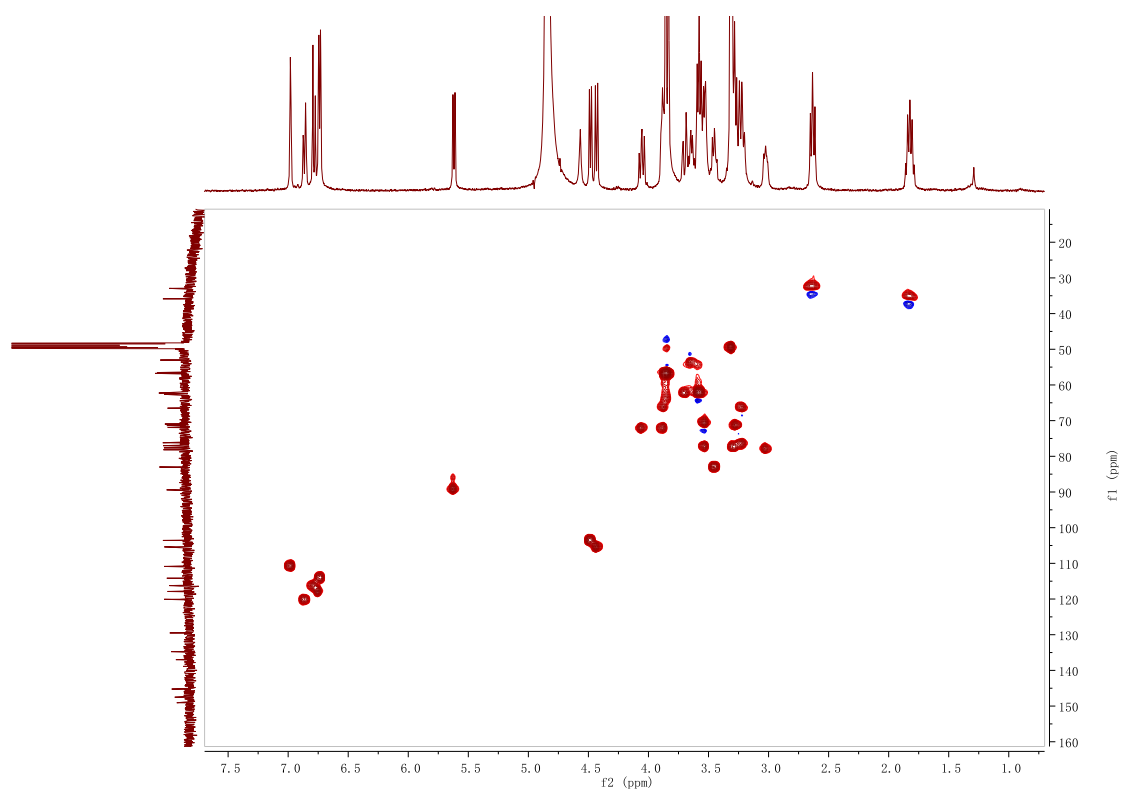

**Fig. S33 HSQC spectrum of compound 4**

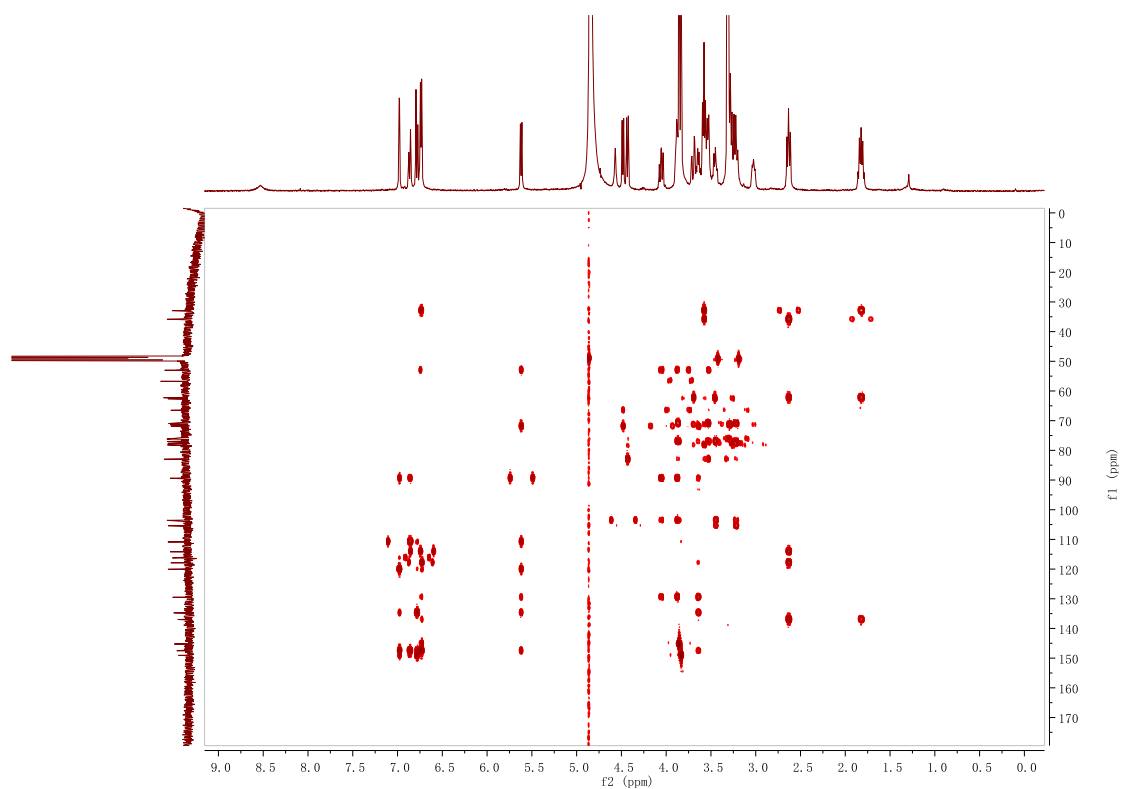

**Fig. S34 HMBC spectrum of compound 4**

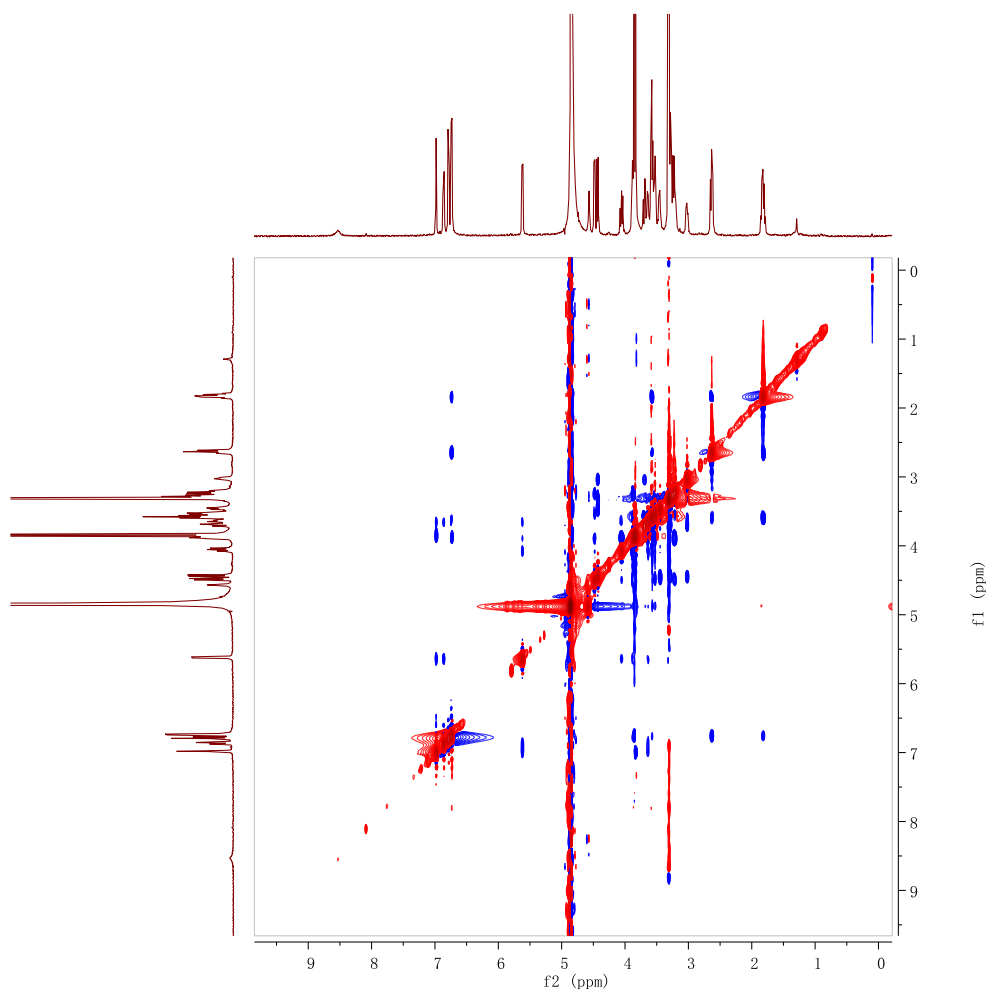

**Fig. S35 NOESY spectrum of compound 4**

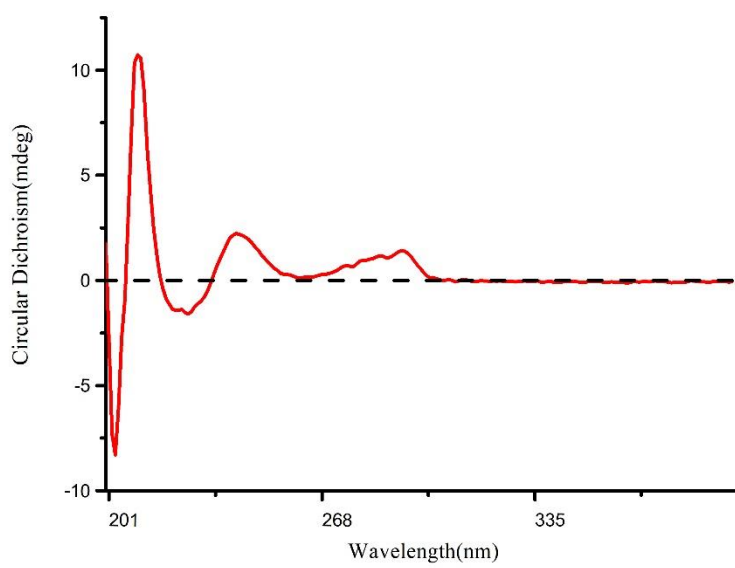

**Fig. S36 Experimental CD spectrum of compound 4**

## Single Mass Analysis

Tolerance = 5.0 PPM / DBE: min = -1.5, max = 50.0

Element prediction: Off

Number of isotope peaks used for i-FIT = 3

Monoisotopic Mass, Even Electron Ions

229 formula(e) evaluated with 1 results within limits (up to 60 closest results for each mass)

Elements Used:

C: 0-70 H: 0-200 O: 0-40 Na: 0-1

ID:3L4A8

2020081720 74 (0.610)

1: TOF MS ES+  
1.19e+006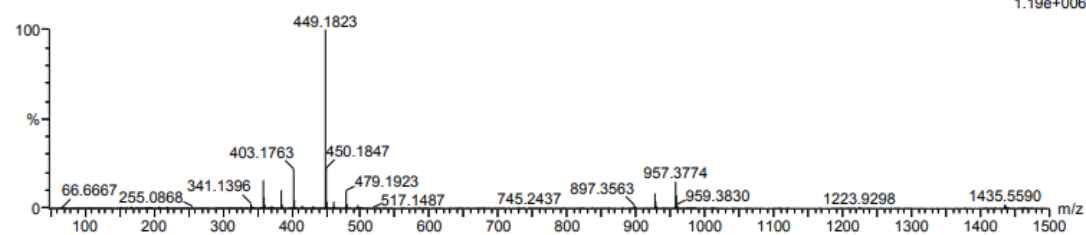Minimum: 5.0 5.0 -1.5  
Maximum: 5.0 5.0 50.0

| Mass     | Calc. Mass | mDa | PPM | DBE | i-FIT | Conf (%) | Formula     |
|----------|------------|-----|-----|-----|-------|----------|-------------|
| 479.1923 | 479.1917   | 0.6 | 1.3 | 9.5 | 386.4 | n/a      | C24 H31 O10 |

Fig. S37 HR-ESI-MS spectrum of compound 5

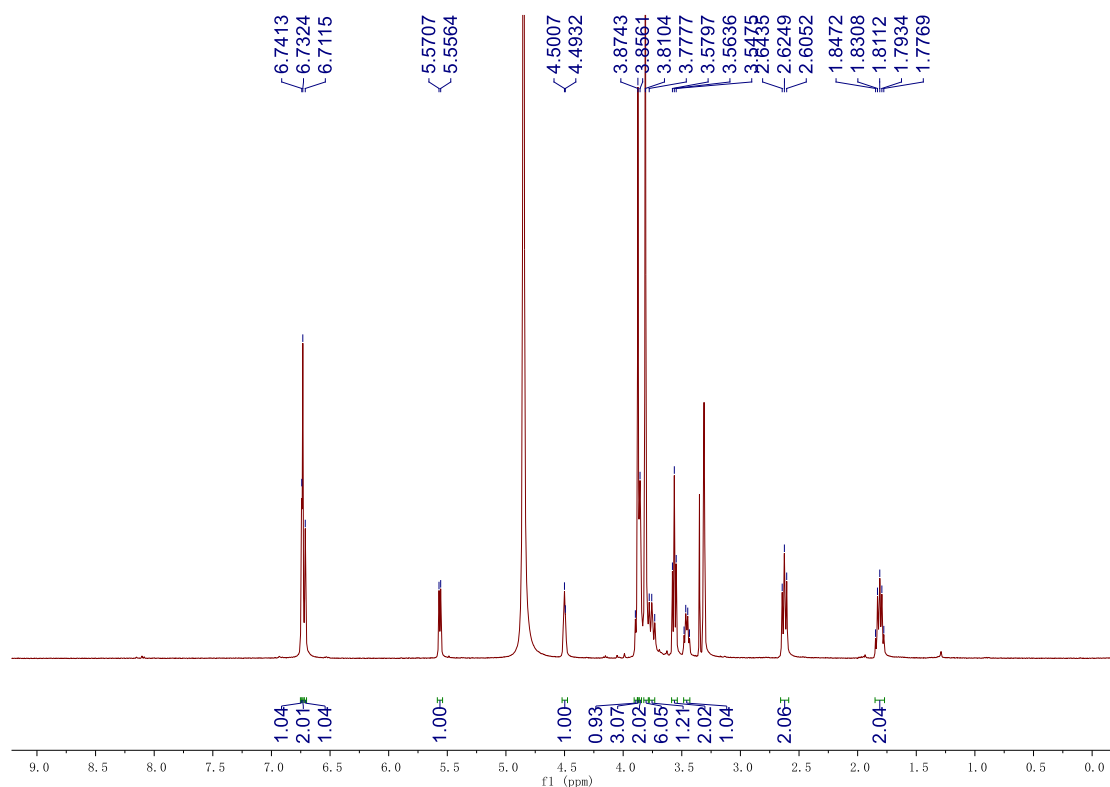Fig. S38 <sup>1</sup>H NMR spectrum of compound 5

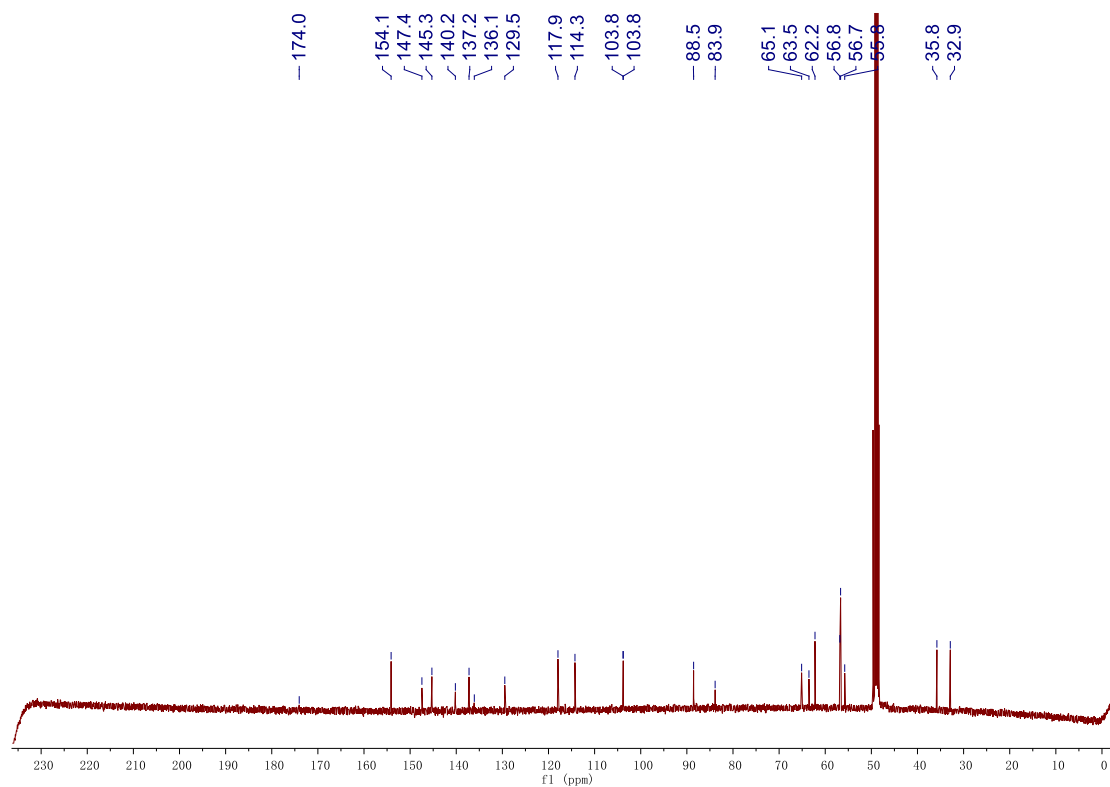

Fig. S39  $^{13}\text{C}$  NMR spectrum of compound 5

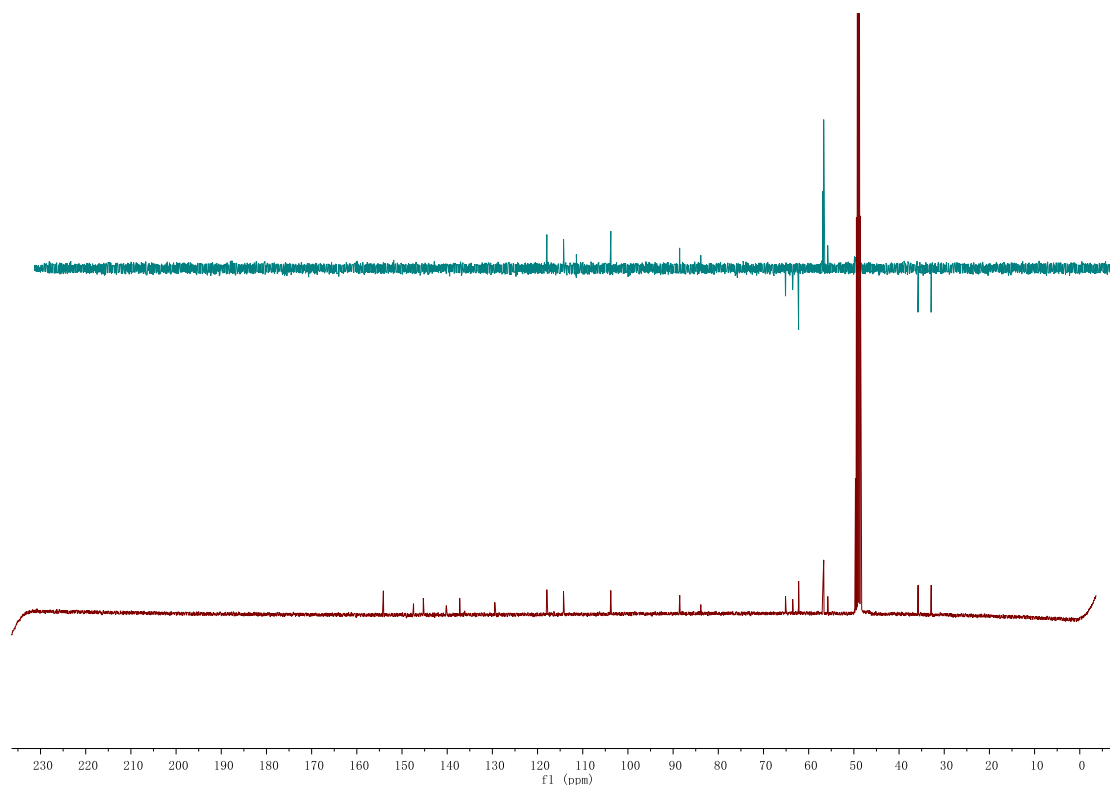

Fig. S40  $^{13}\text{C}$ -NMR and DEPT 135 spectra of compound 5

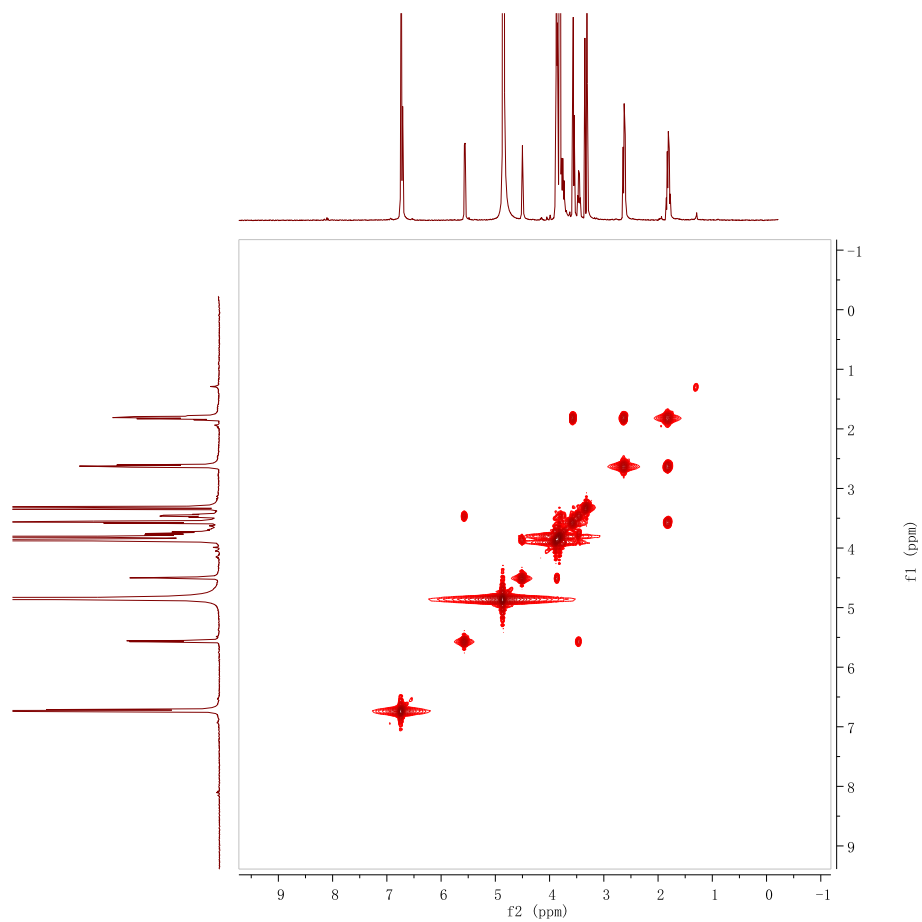

**Fig. S41  $^1\text{H}$ - $^1\text{H}$  COSY spectrum of compound 5**

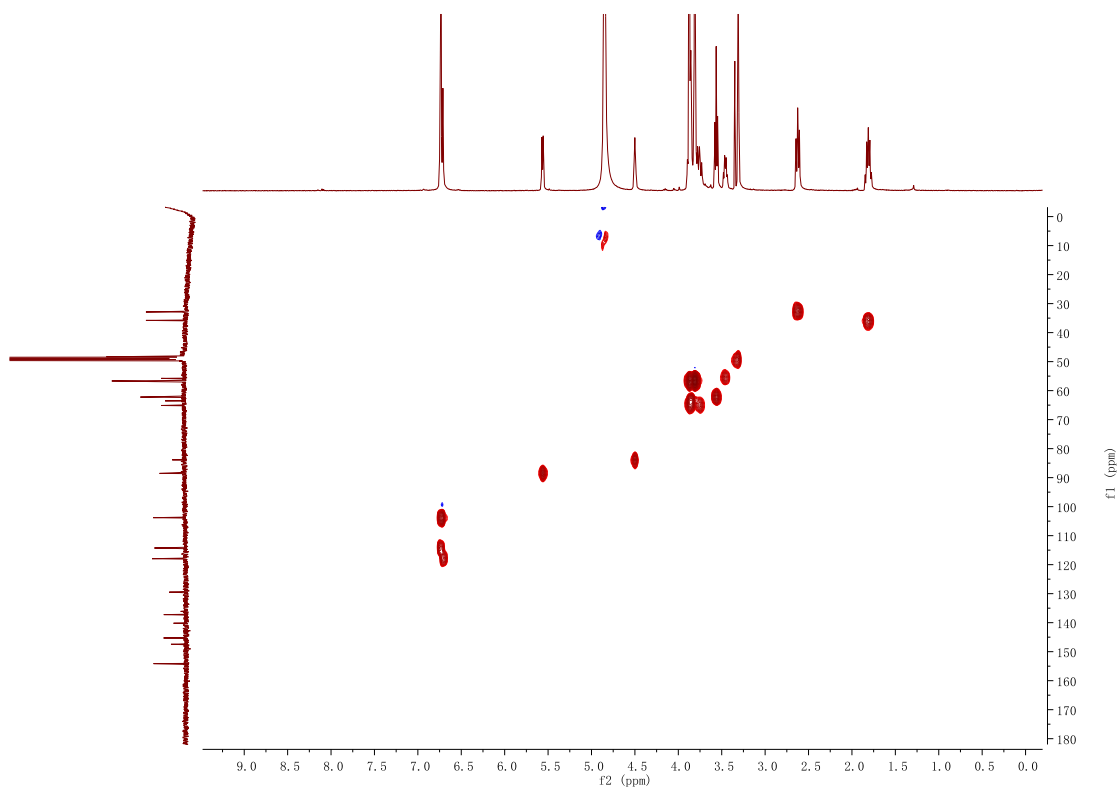

**Fig. S42 HSQC spectrum of compound 5**



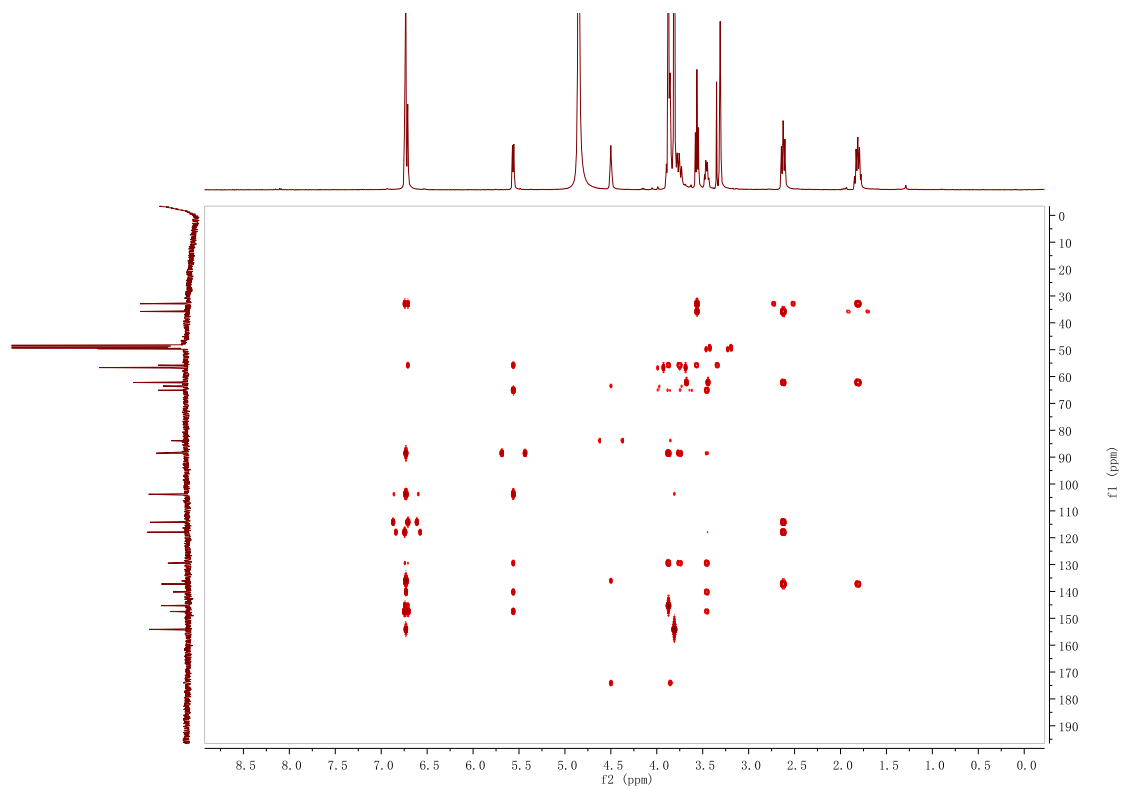

**Fig. S43** HMBC spectrum of compound **5**

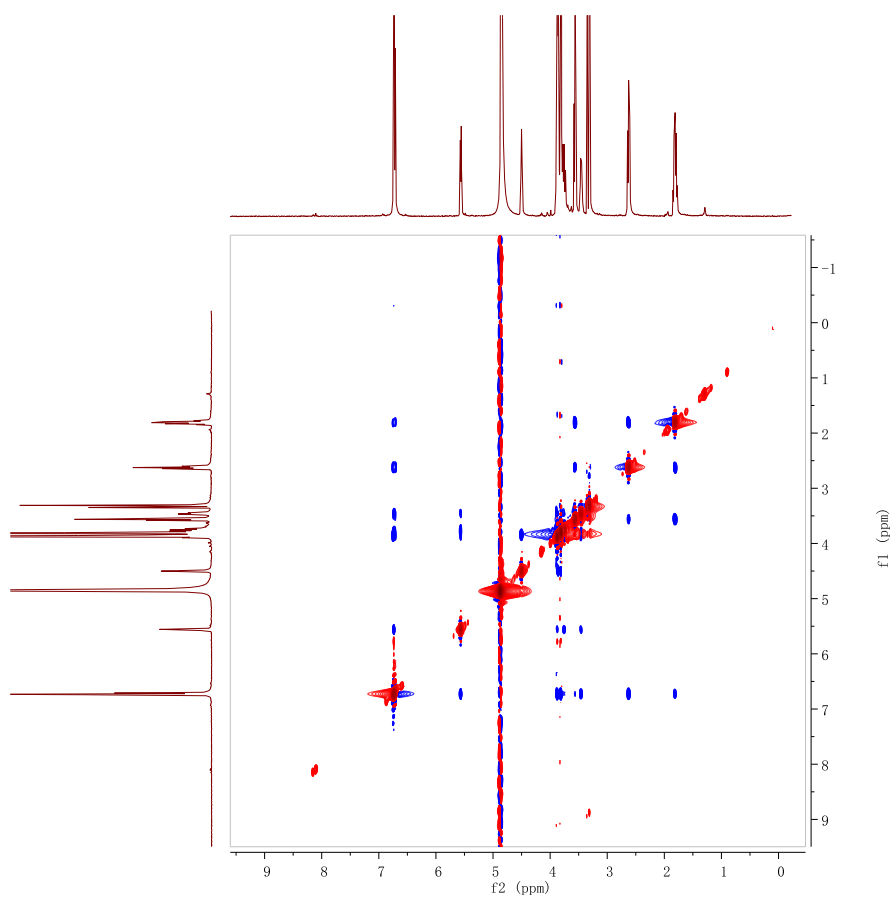

**Fig. S44** NOESY spectrum of compound **5**

## Single Mass Analysis

Tolerance = 5.0 PPM / DBE: min = -1.5, max = 50.0

Element prediction: Off

Number of isotope peaks used for i-FIT = 3

Monoisotopic Mass, Even Electron Ions

217 formula(e) evaluated with 1 results within limits (up to 50 best isotopic matches for each mass)

Elements Used:

C: 0-500 H: 0-1000 O: 0-200 Na: 0-1

ID-3G8G

20201123-18 87 (0.718)

1: TOF MS ES+  
1.78e+005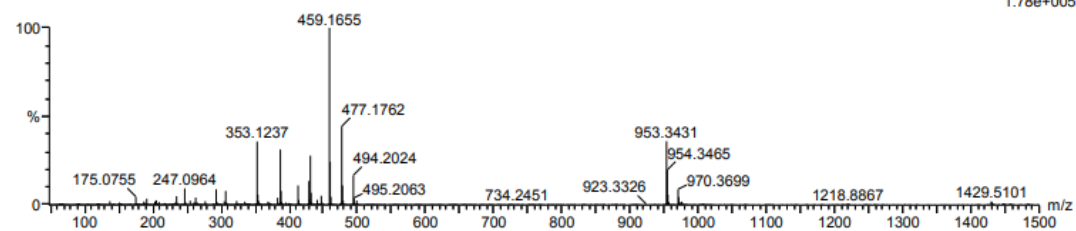

|          |            |     |     |      |       |          |             |  |  |
|----------|------------|-----|-----|------|-------|----------|-------------|--|--|
| Minimum: |            |     |     |      |       |          |             |  |  |
| Maximum: | 5.0        | 5.0 |     | -1.5 |       |          |             |  |  |
| Mass     | Calc. Mass | mDa | PPM | DBE  | i-FIT | Conf (%) | Formula     |  |  |
| 477.1762 | 477.1761   | 0.1 | 0.2 | 10.5 | 352.5 | n/a      | C24 H29 O10 |  |  |

Fig. S45 HR-ESI-MS spectrum of compound 6

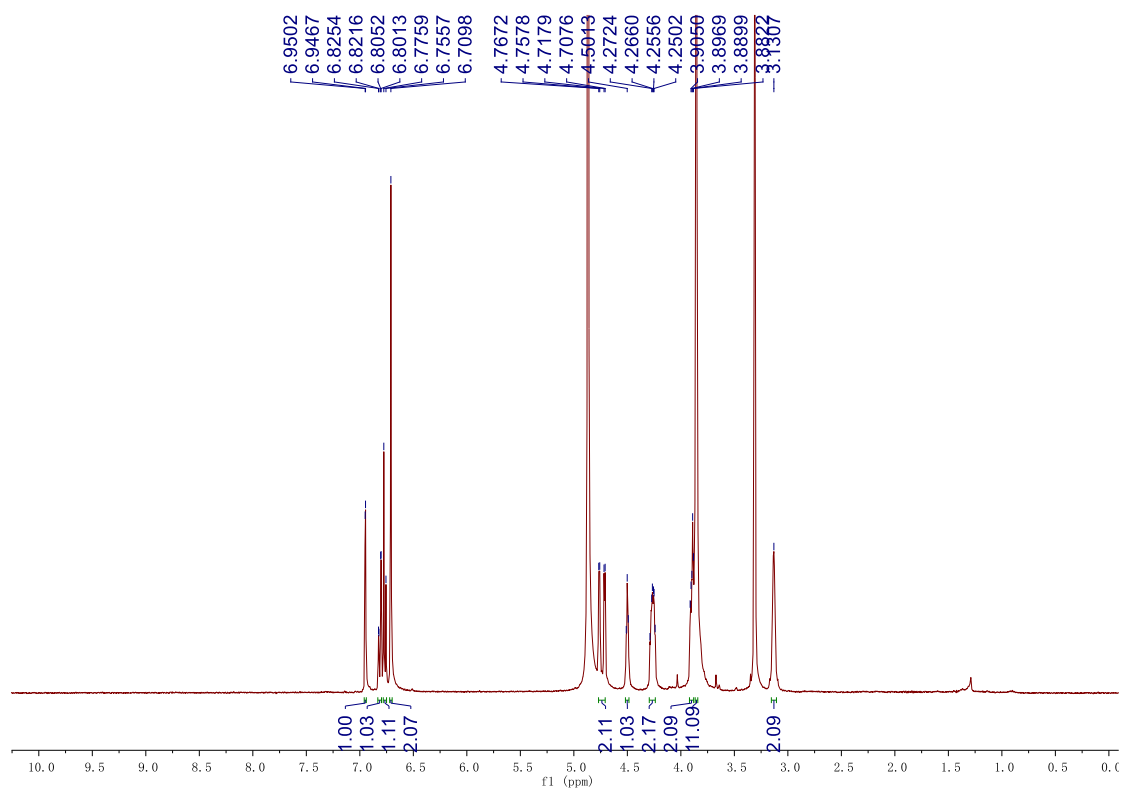Fig. S46 <sup>1</sup>H NMR spectrum of compound 6

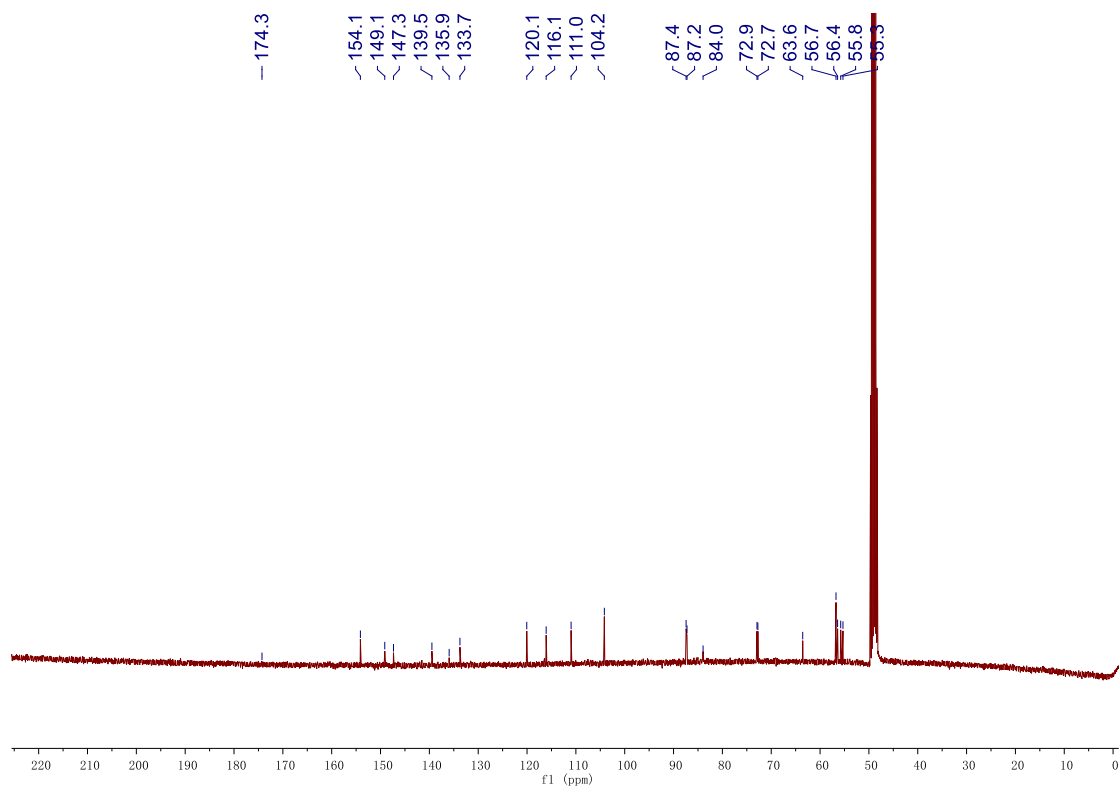

**Fig. S47  $^{13}\text{C}$  NMR spectrum of compound 6**

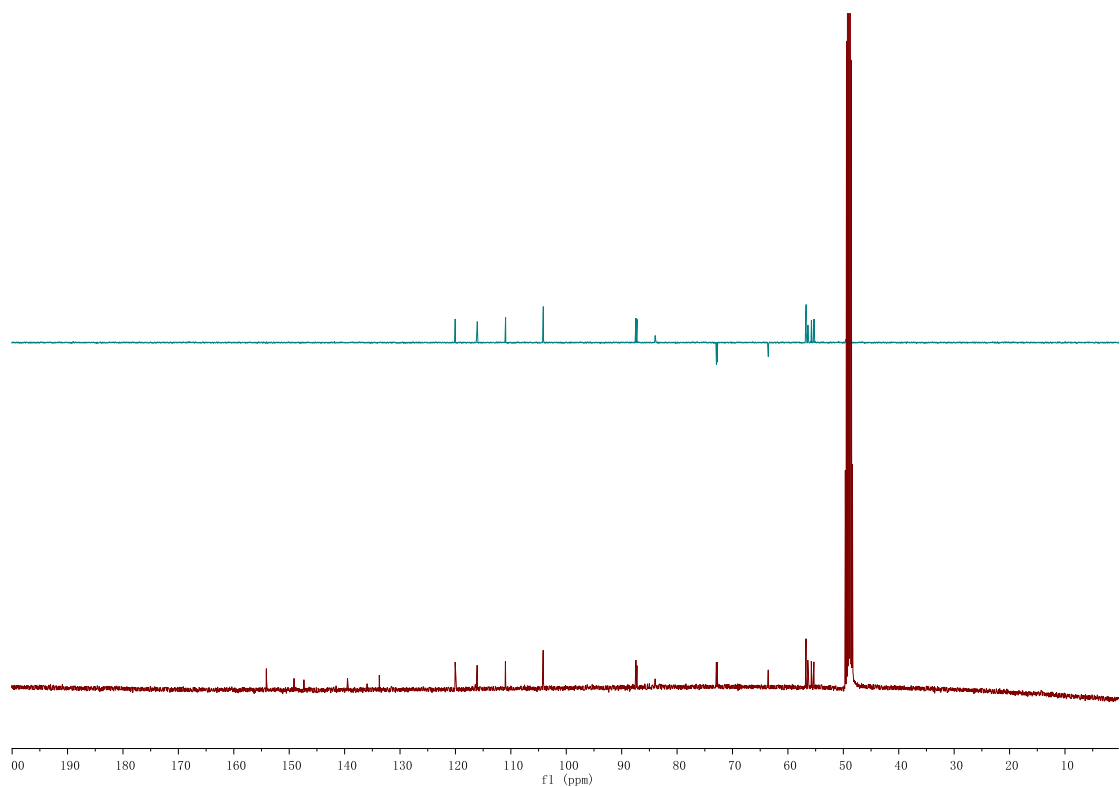

**Fig. S48  $^{13}\text{C}$ -NMR and DEPT 135 spectra of compound 6**

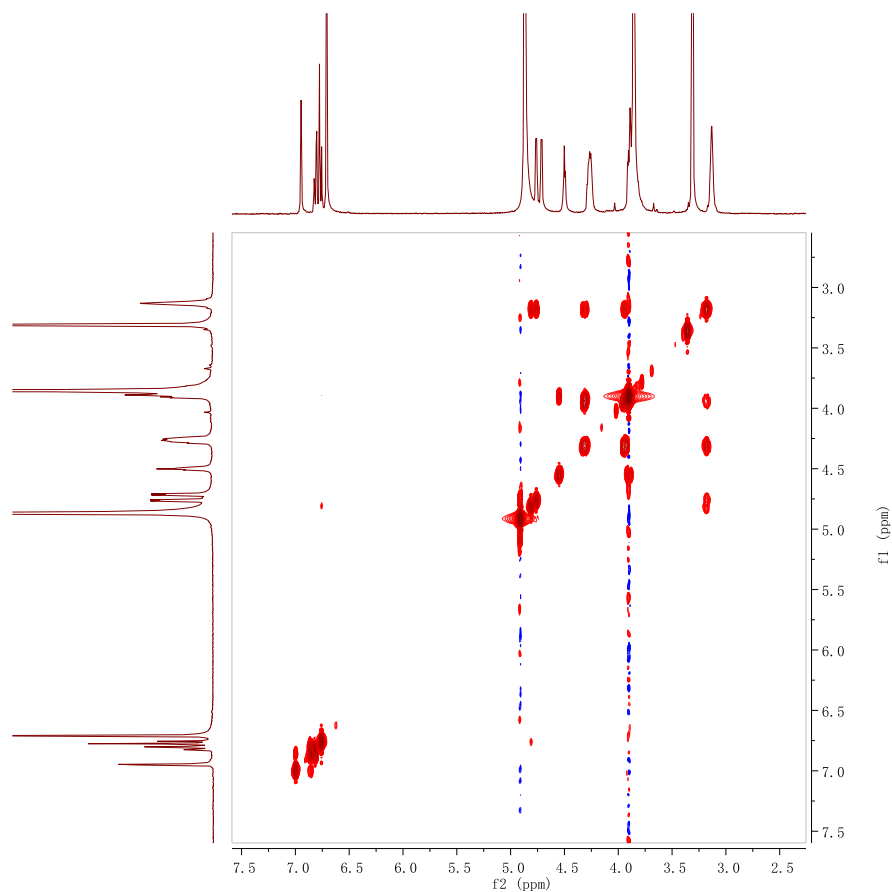

**Fig. S49  $^1\text{H}$ - $^1\text{H}$  COSY spectrum of compound 6**

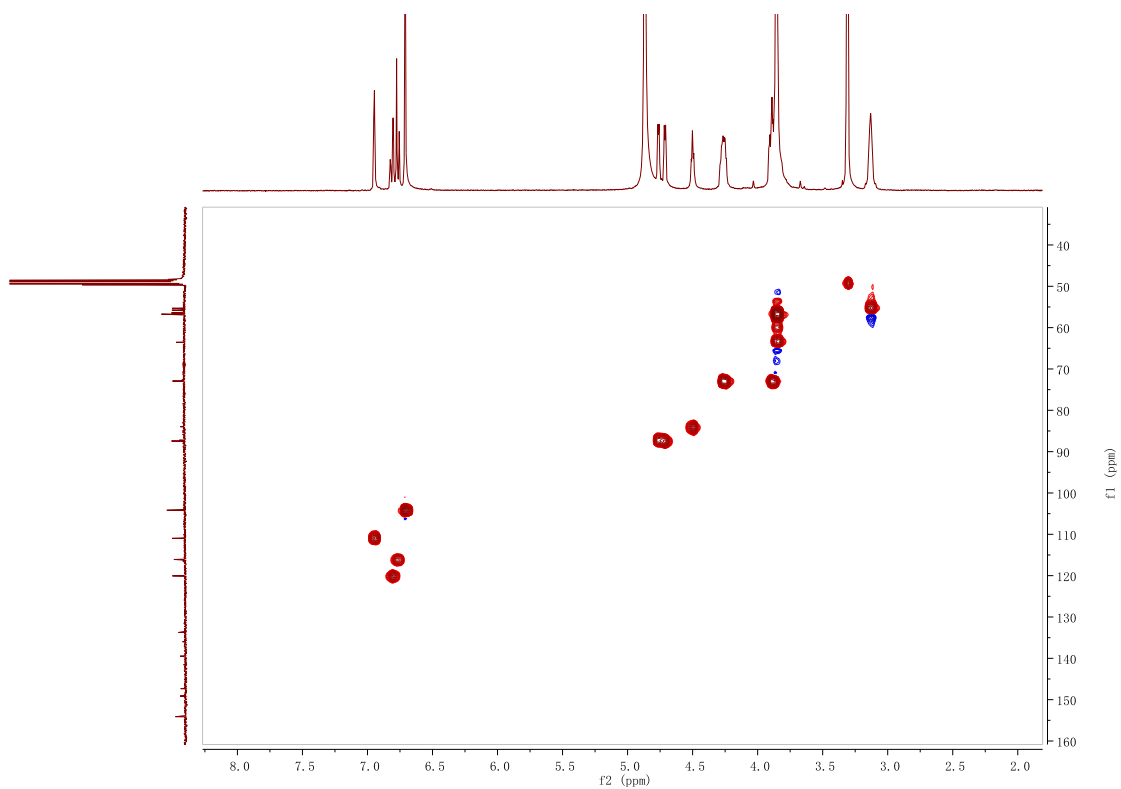

**Fig. S50 HSQC spectrum of compound 6**

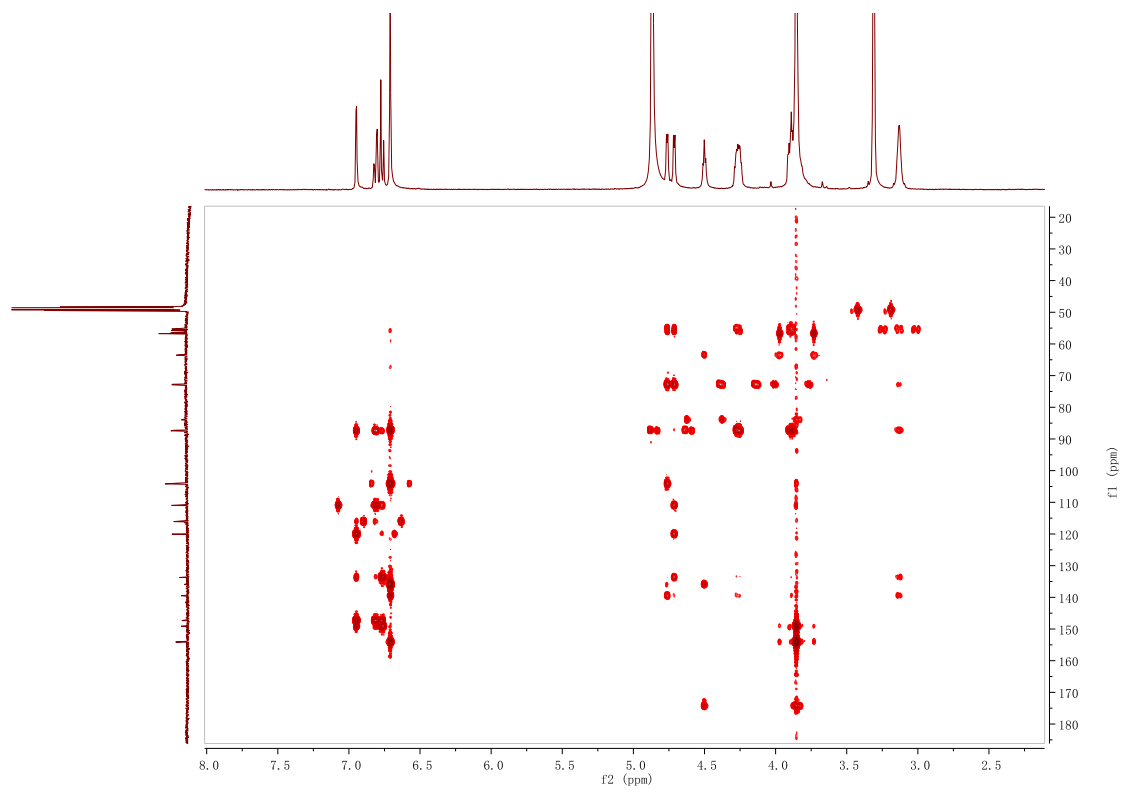

**Fig. S51 HMBC spectrum of compound 6**

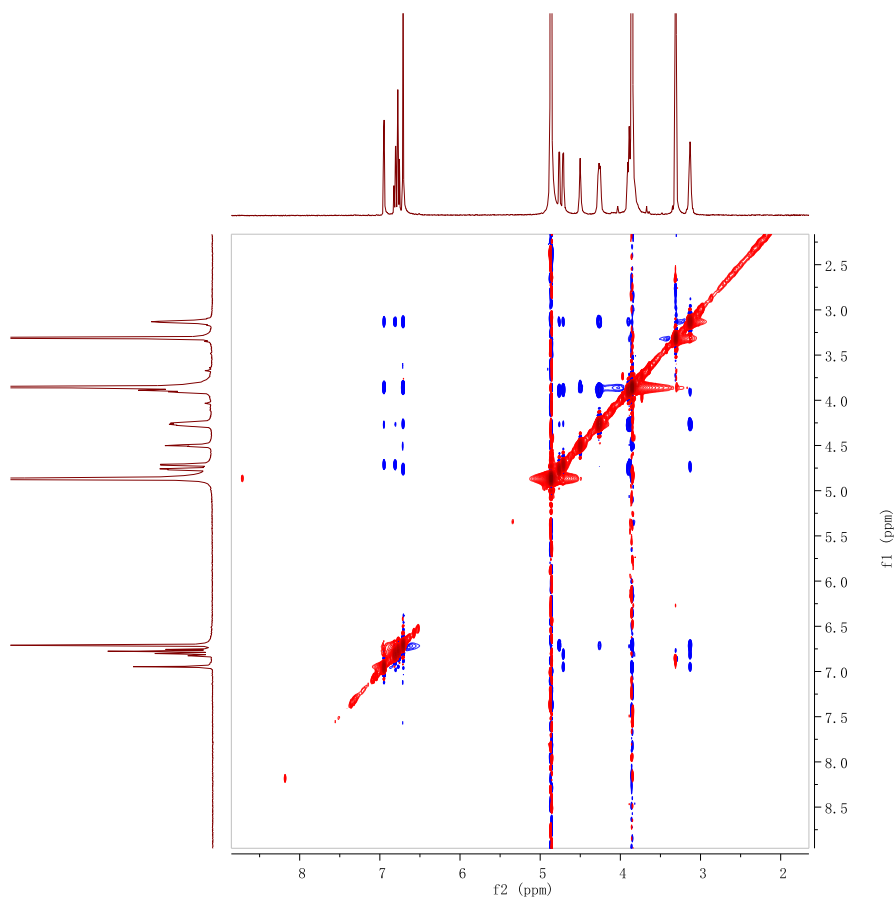

**Fig. S52 NOESY spectrum of compound 6**

## Single Mass Analysis

Tolerance = 1.0 PPM / DBE: min = -1.5, max = 50.0

Element prediction: Off

Number of isotope peaks used for i-FIT = 3

Monoisotopic Mass, Even Electron Ions

388 formula(e) evaluated with 1 results within limits (up to 50 best isotopic matches for each mass)

Elements Used:

C: 0-500 H: 0-1000 O: 0-200 Na: 0-1

ID-3F9F1

20191209004 42 (0.348)

1: TOF MS ES+  
1.09e+005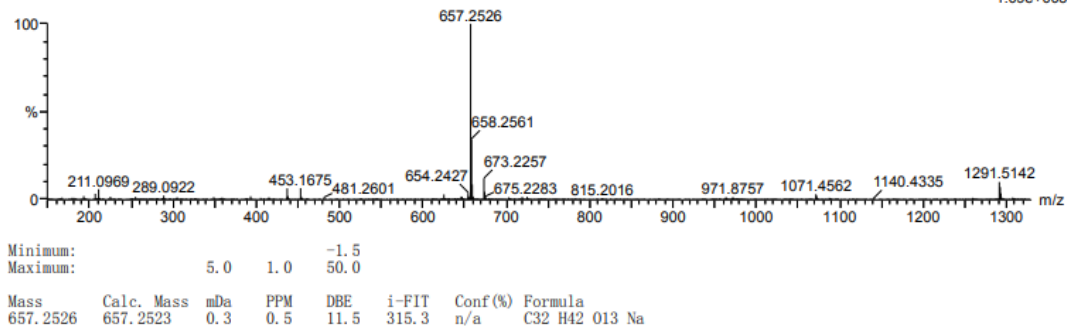

Fig. S53 HR-ESI-MS spectrum of compound 7

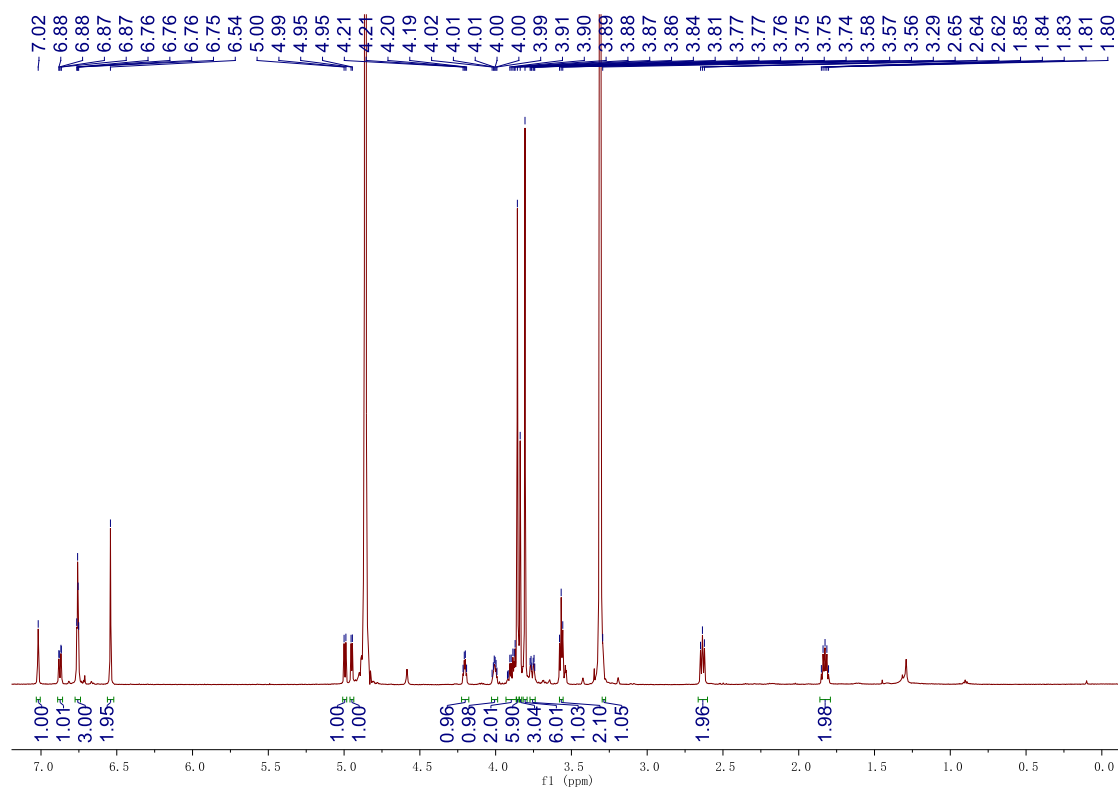Fig. S54 <sup>1</sup>H NMR spectrum of compound 7

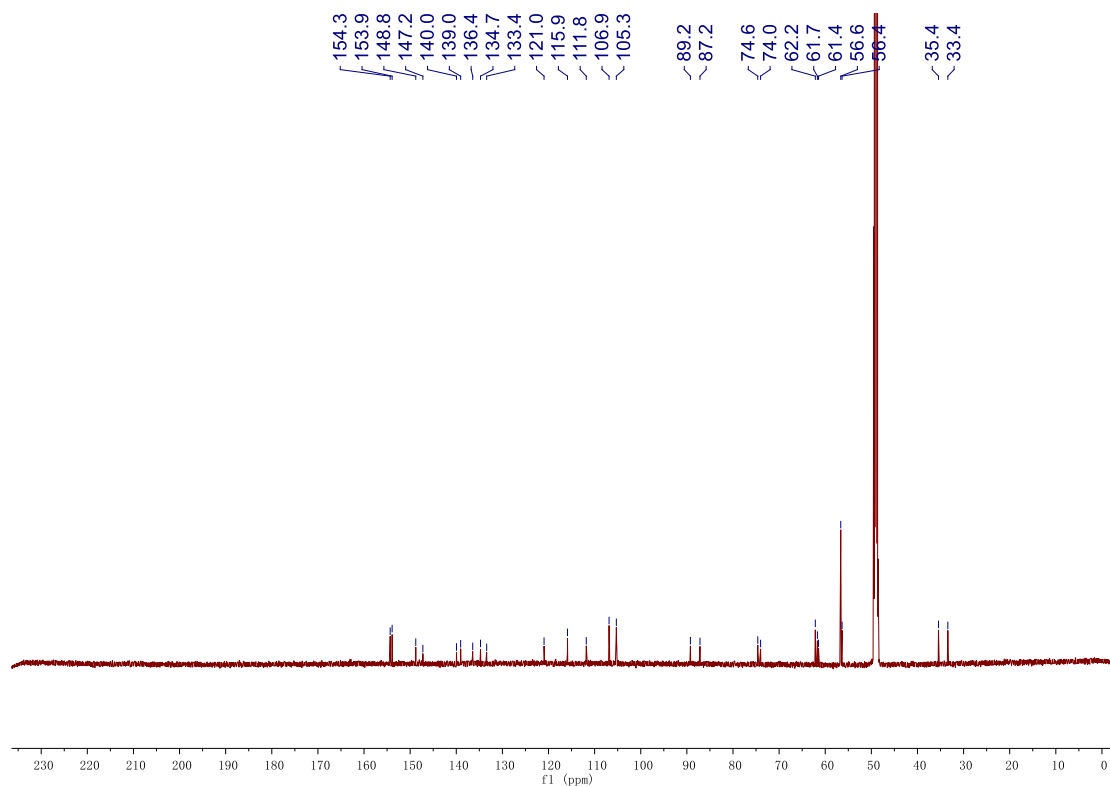

**Fig. S55**  $^{13}\text{C}$  NMR spectrum of compound **7**

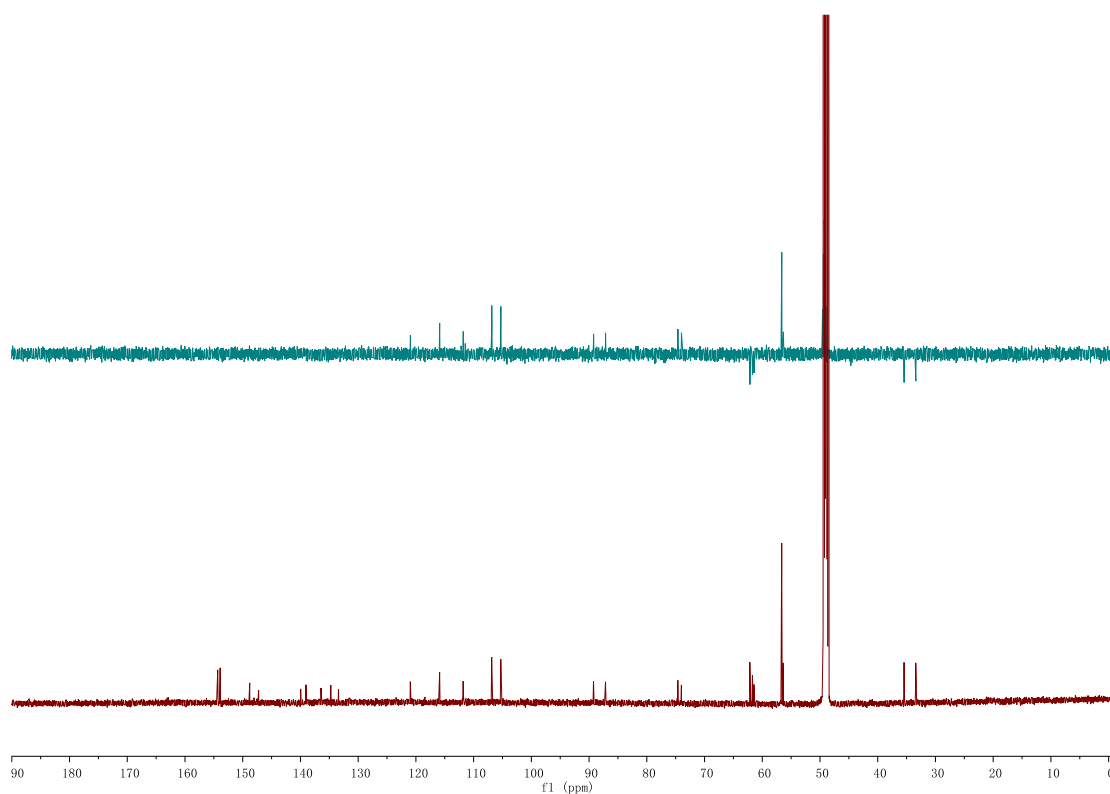

**Fig. S56**  $^{13}\text{C}$ -NMR and DEPT 135 spectra of compound **7**

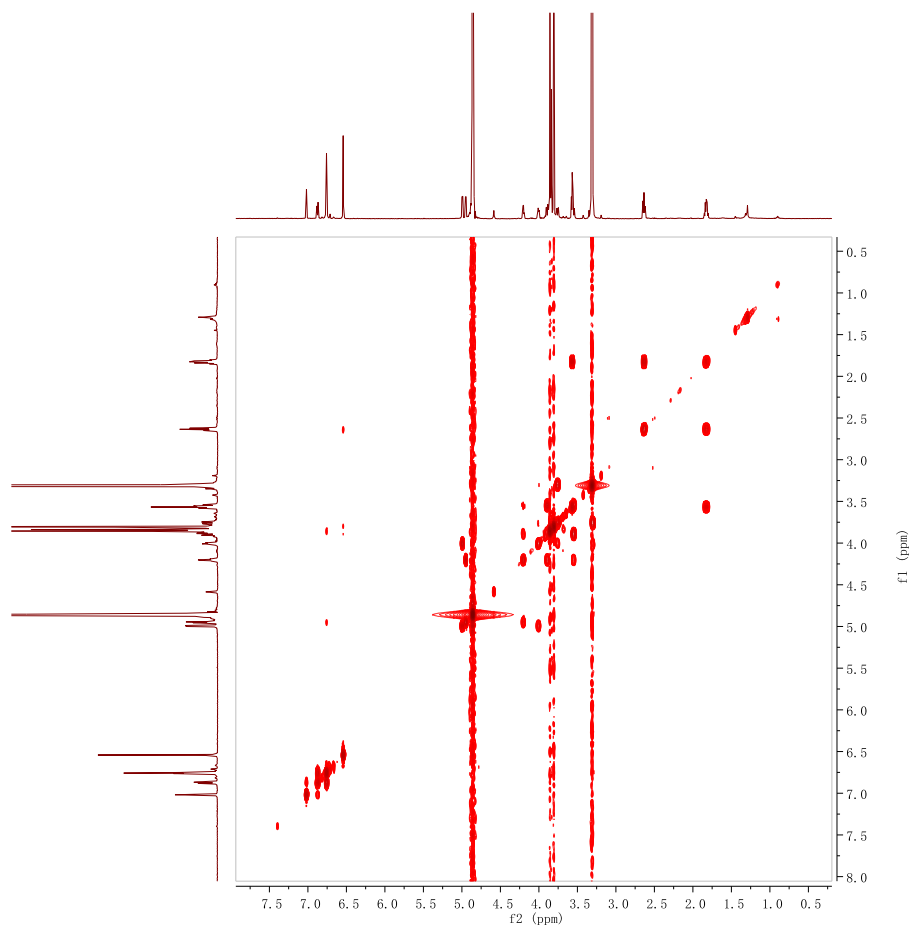

**Fig. S57**  $^1\text{H}$ - $^1\text{H}$  COSY spectrum of compound **7**

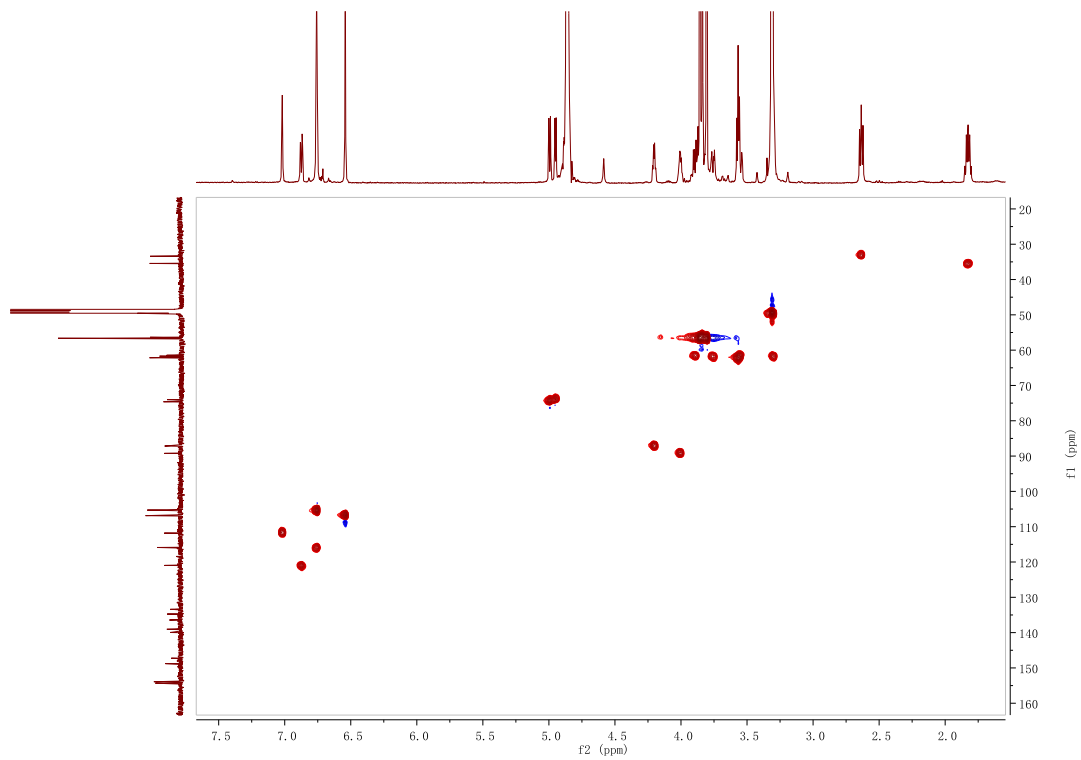

**Fig. S58** HSQC spectrum of compound **7**



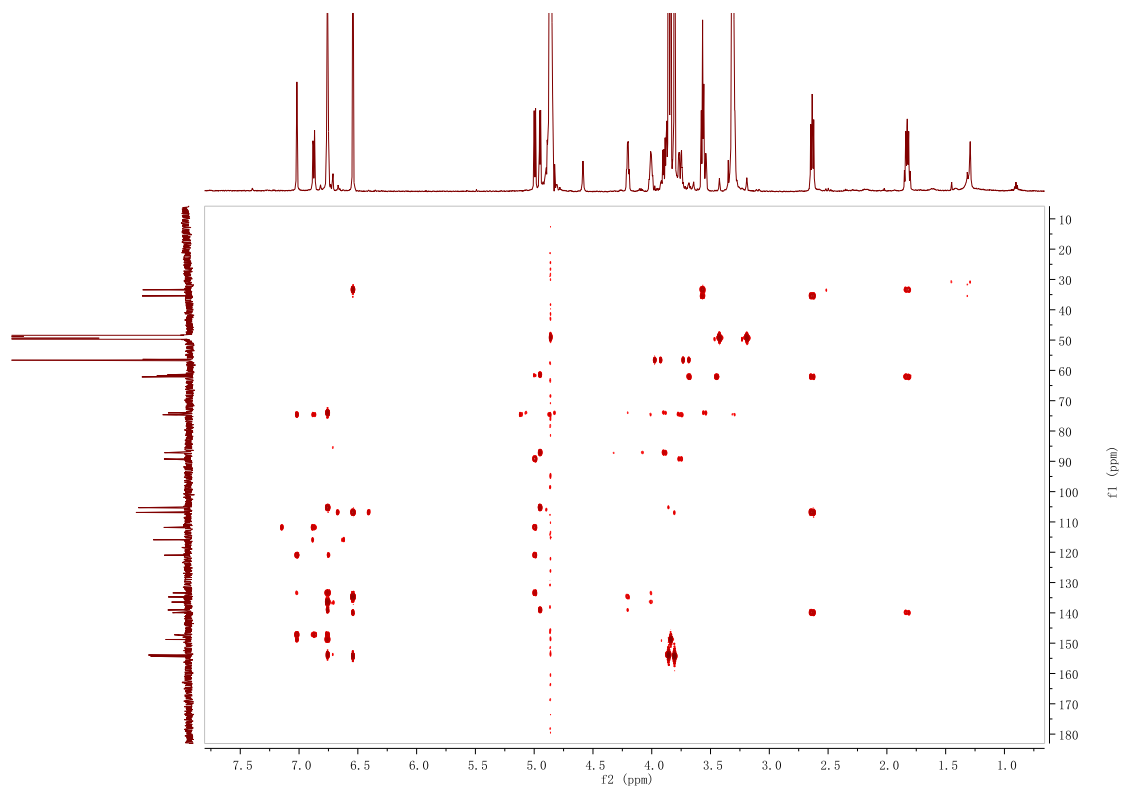

**Fig. S59** HMBC spectrum of compound **7**

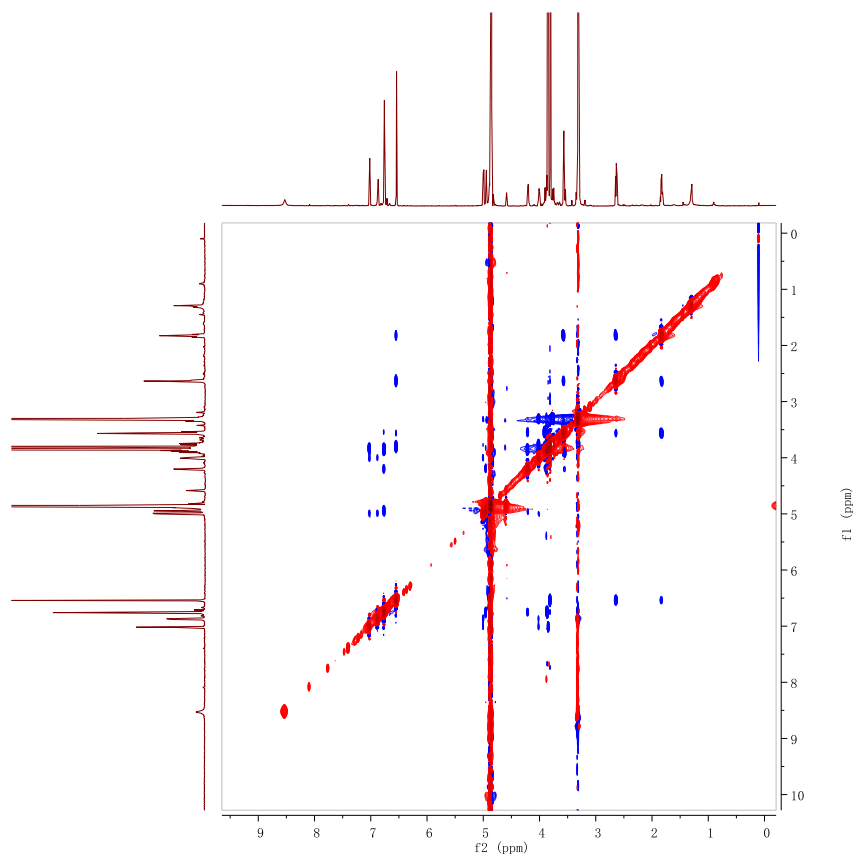

**Fig. S60** NOESY spectrum of compound **7**

## Single Mass Analysis

Tolerance = 5.0 PPM / DBE: min = -1.5, max = 50.0

Element prediction: Off

Number of isotope peaks used for i-FIT = 3

Monoisotopic Mass, Even Electron Ions

514 formula(e) evaluated with 3 results within limits (up to 60 closest results for each mass)

Elements Used:

C: 0-70 H: 0-200 O: 0-40 Na: 0-1

ID-3L4A5B

20200824008 40 (0.333)

1: TOF MS ES+  
1.01e+005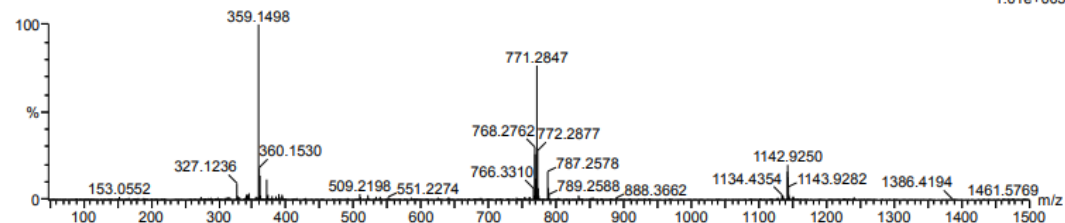

Minimum: -1.5  
Maximum: 50.0

| Mass     | Calc. Mass | mDa  | PPM  | DBE  | i-FIT | Conf (%) | Formula        |
|----------|------------|------|------|------|-------|----------|----------------|
| 771.2847 | 771.2840   | 0.7  | 0.9  | 13.5 | 291.7 | 83.35    | C37 H48 O16 Na |
| 771.2864 | 771.2864   | -1.7 | -2.2 | 16.5 | 293.3 | 16.47    | C39 H47 O16    |
| 771.2875 | 771.2875   | -2.8 | -3.6 | 35.5 | 297.9 | 0.18     | C55 H40 O3 Na  |

Fig. S61 HR-ESI-MS spectrum of compound 8

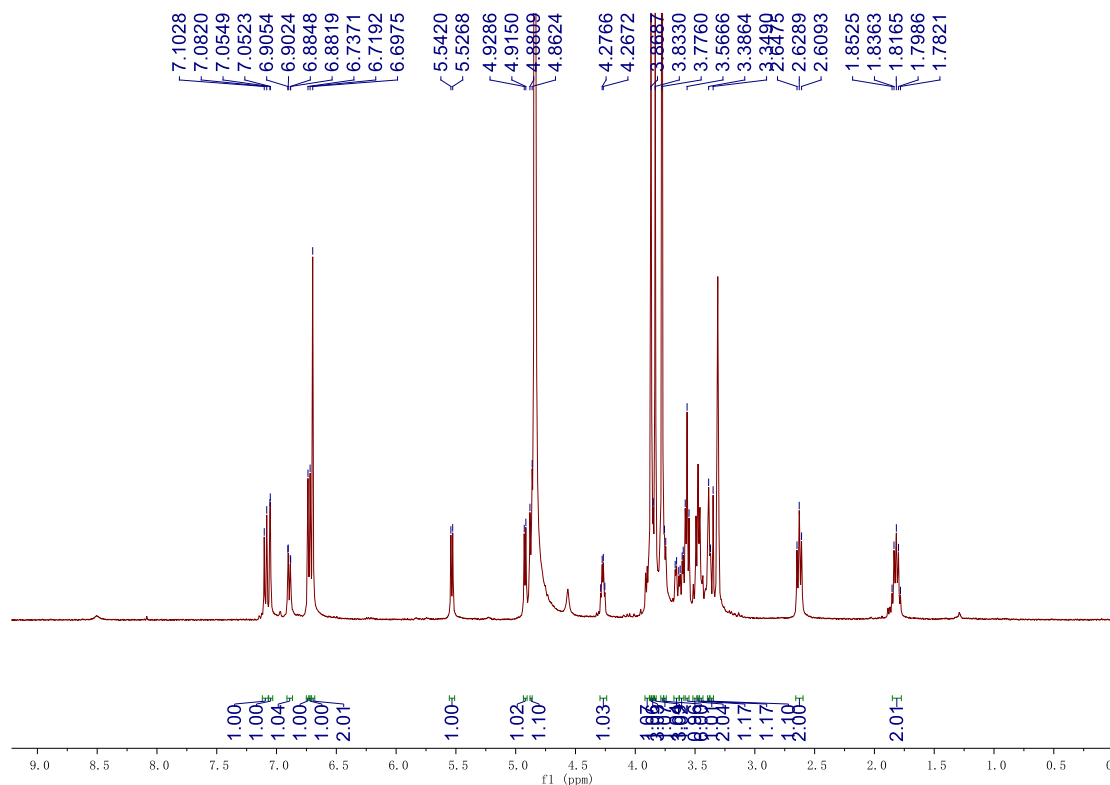Fig. S62 <sup>1</sup>H NMR spectrum of compound 8

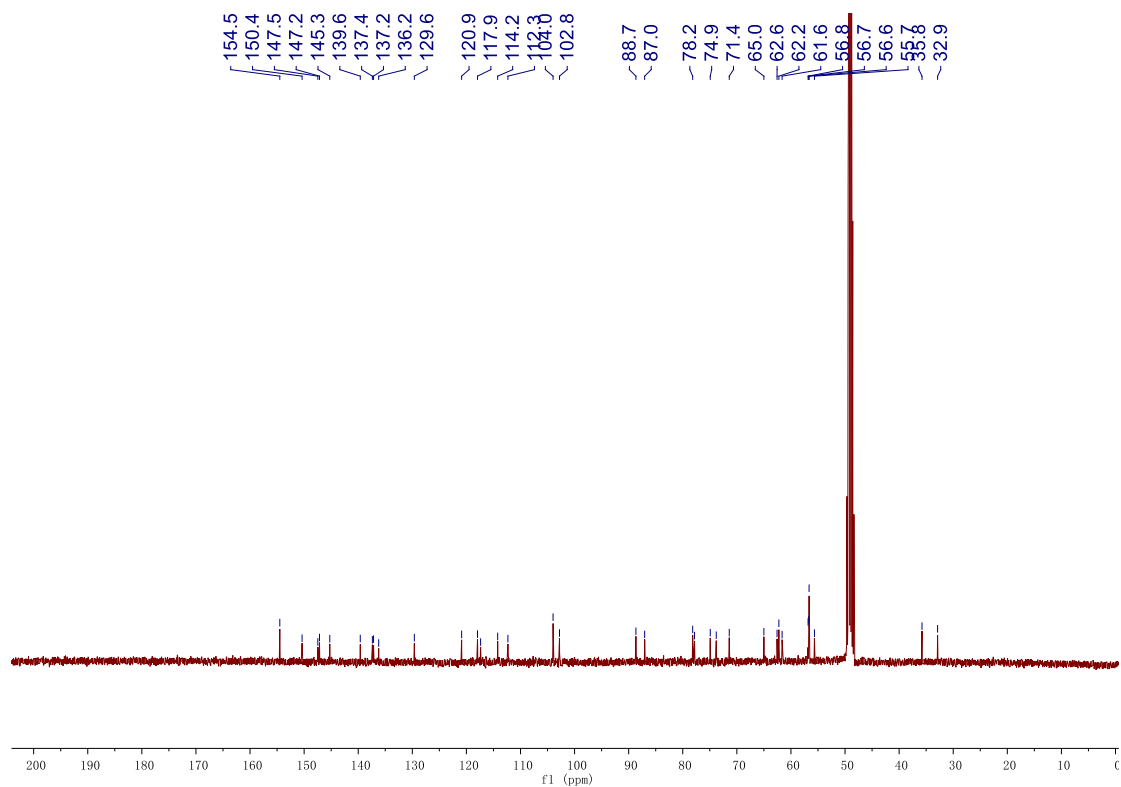

**Fig. S63**  $^{13}\text{C}$  NMR spectrum of compound **8**

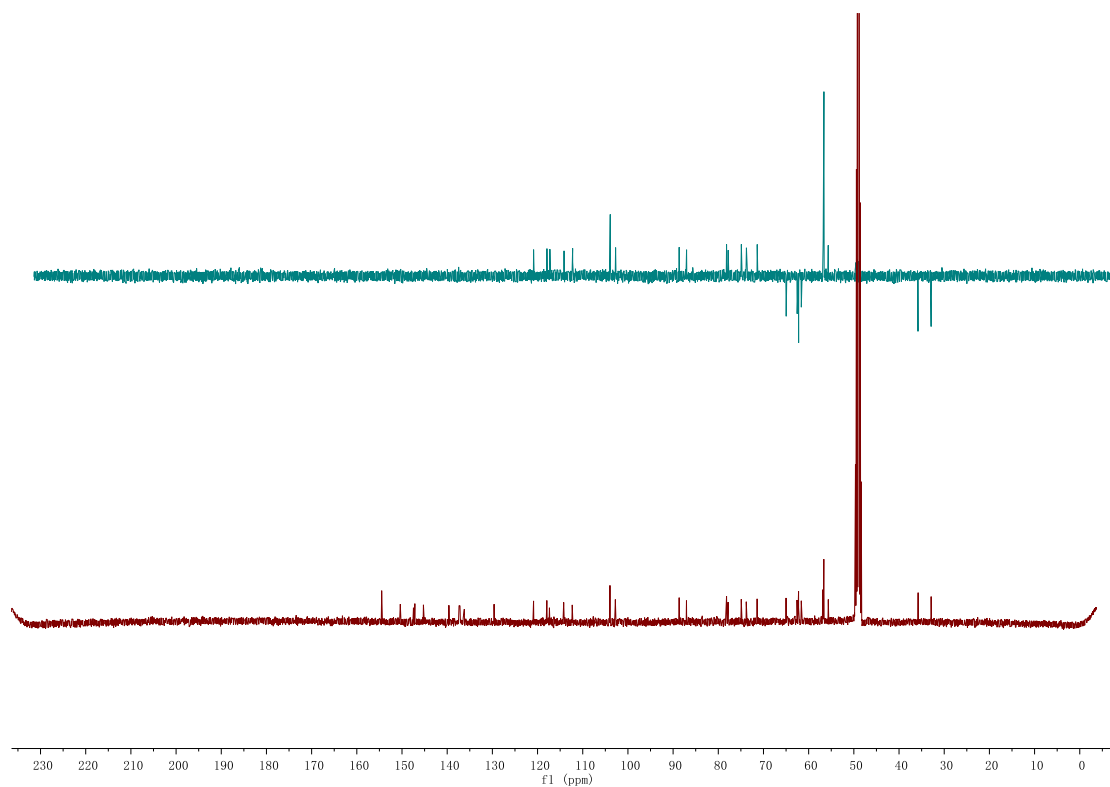

**Fig. S64**  $^{13}\text{C}$ -NMR and DEPT 135 spectra of compound **8**

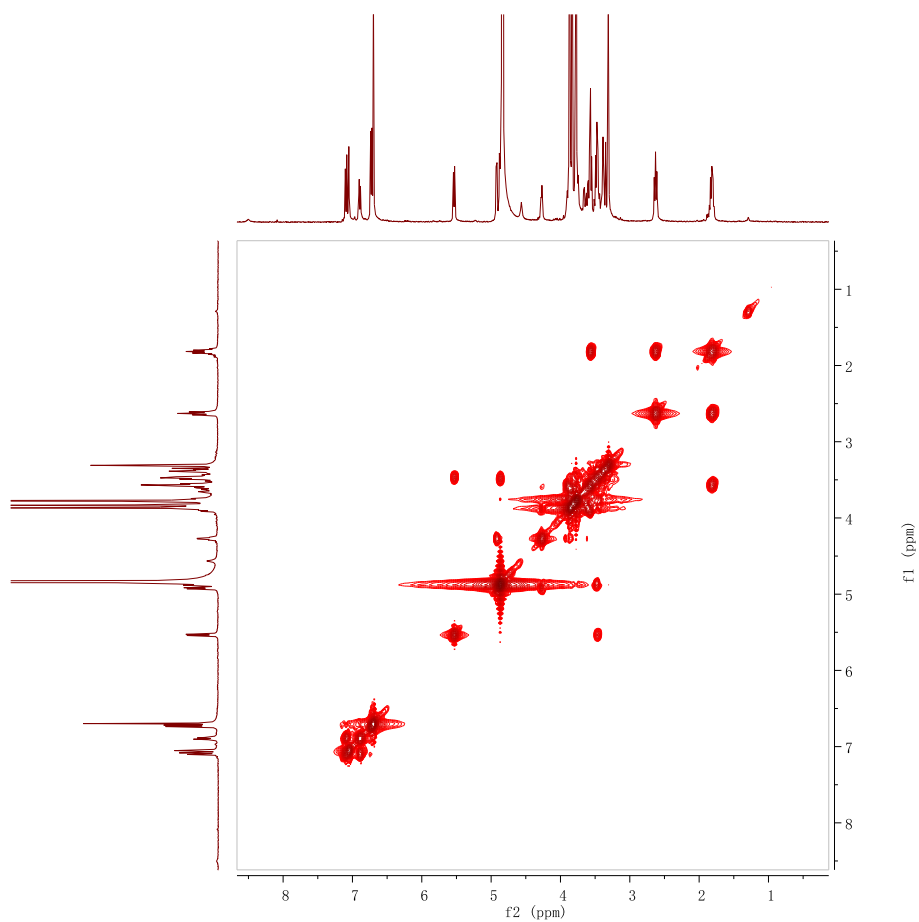

**Fig. S65  $^1\text{H}$ - $^1\text{H}$  COSY spectrum of compound 8**

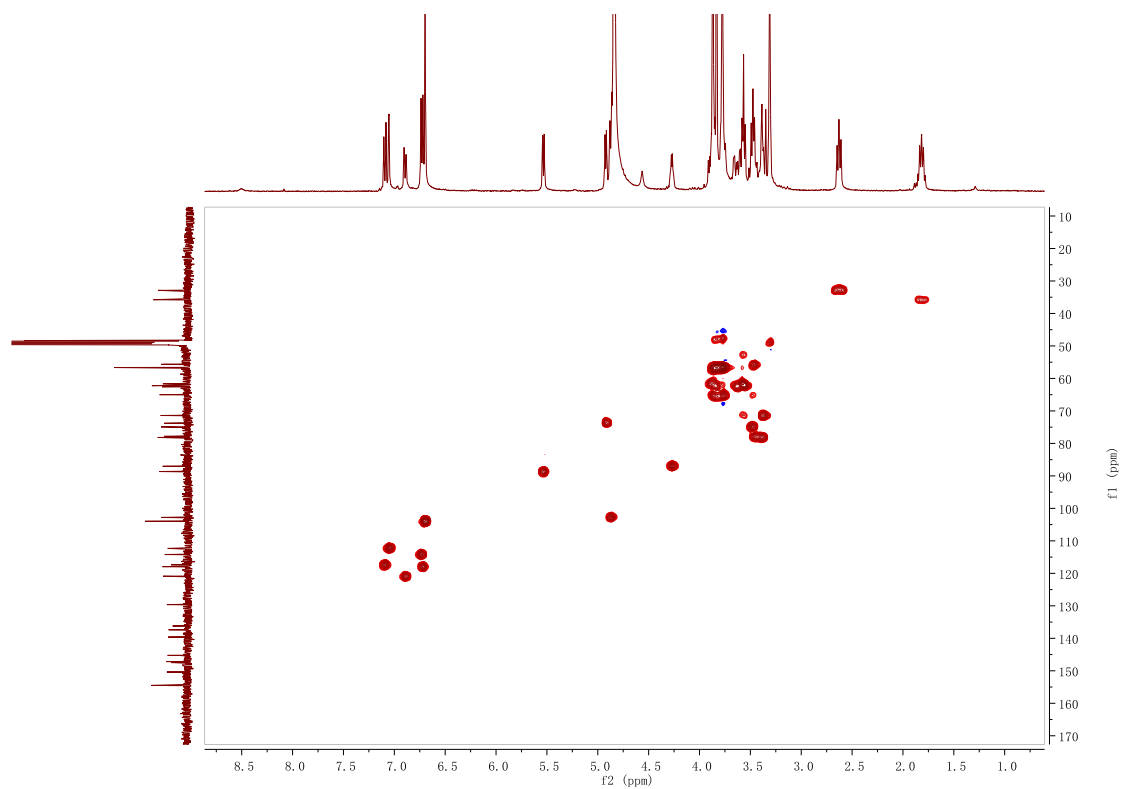

**Fig. S66 HSQC spectrum of compound 8**

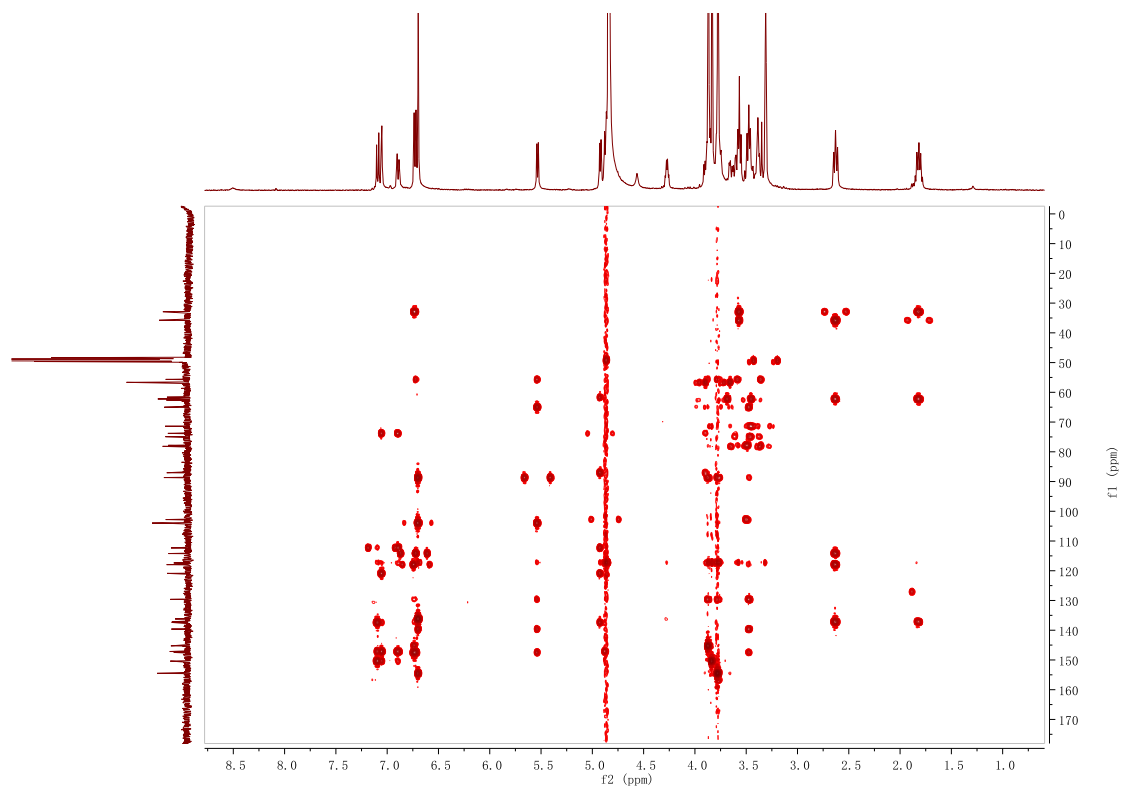

**Fig. S67 HMBC spectrum of compound 8**

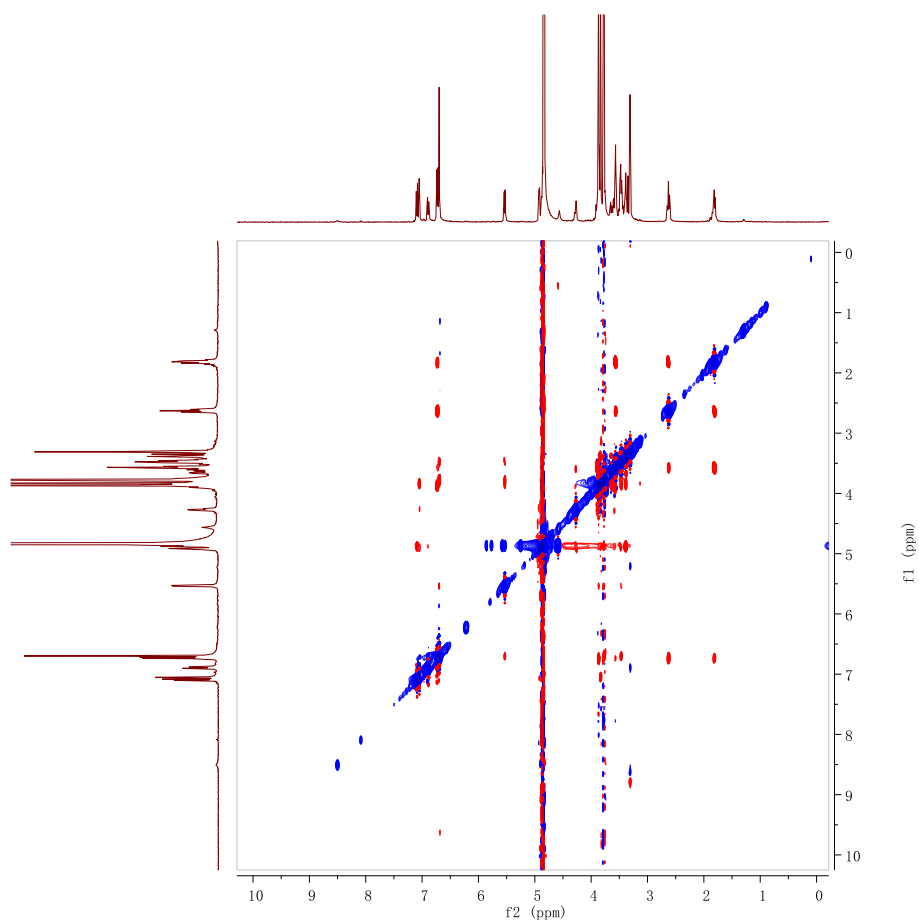

**Fig. S68 NOESY spectrum of compound 8**

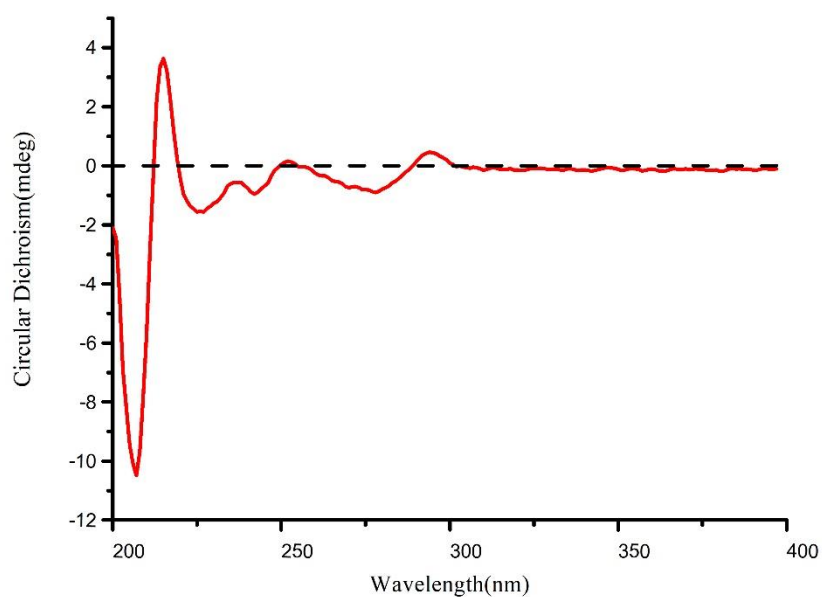

**Fig. S69 Experimental CD spectrum of compound 8**

**Elemental Composition Report**

Page 1

**Single Mass Analysis**

Tolerance = 5.0 PPM / DBE: min = -1.5, max = 50.0

Element prediction: Off

Number of isotope peaks used for i-FIT = 3

Monoisotopic Mass, Even Electron Ions

378 formula(e) evaluated with 3 results within limits (up to 60 closest results for each mass)

Elements Used:

C: 0-60 H: 0-100 O: 0-25 Na: 0-1

ID-3L4A6F

20200907-11 39 (0.326)

1: TOF MS ES+  
1.59e+005

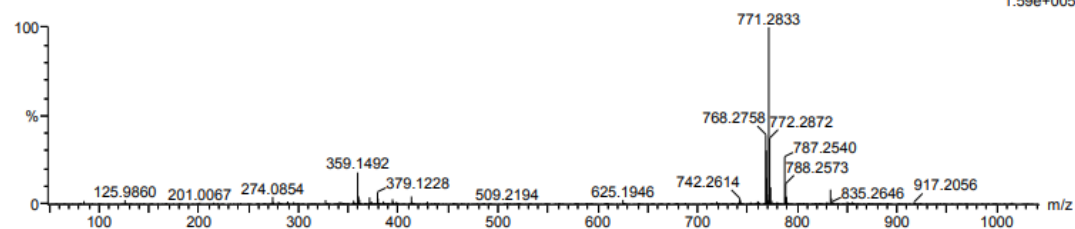

| Mass     | Calc. Mass | mDa  | PPM  | DBE  | i-FIT | Conf (%) | Formula        |
|----------|------------|------|------|------|-------|----------|----------------|
| 771.2833 | 771.2840   | -0.7 | -0.9 | 13.5 | 358.7 | 96.97    | C37 H48 O16 Na |
|          | 771.2805   | 2.8  | 3.6  | 25.5 | 364.5 | 0.29     | C46 H43 O11    |
|          | 771.2864   | -3.1 | -4.0 | 16.5 | 362.2 | 2.74     | C39 H47 O16    |

**Fig. S70 HR-ESI-MS spectrum of compound 9**

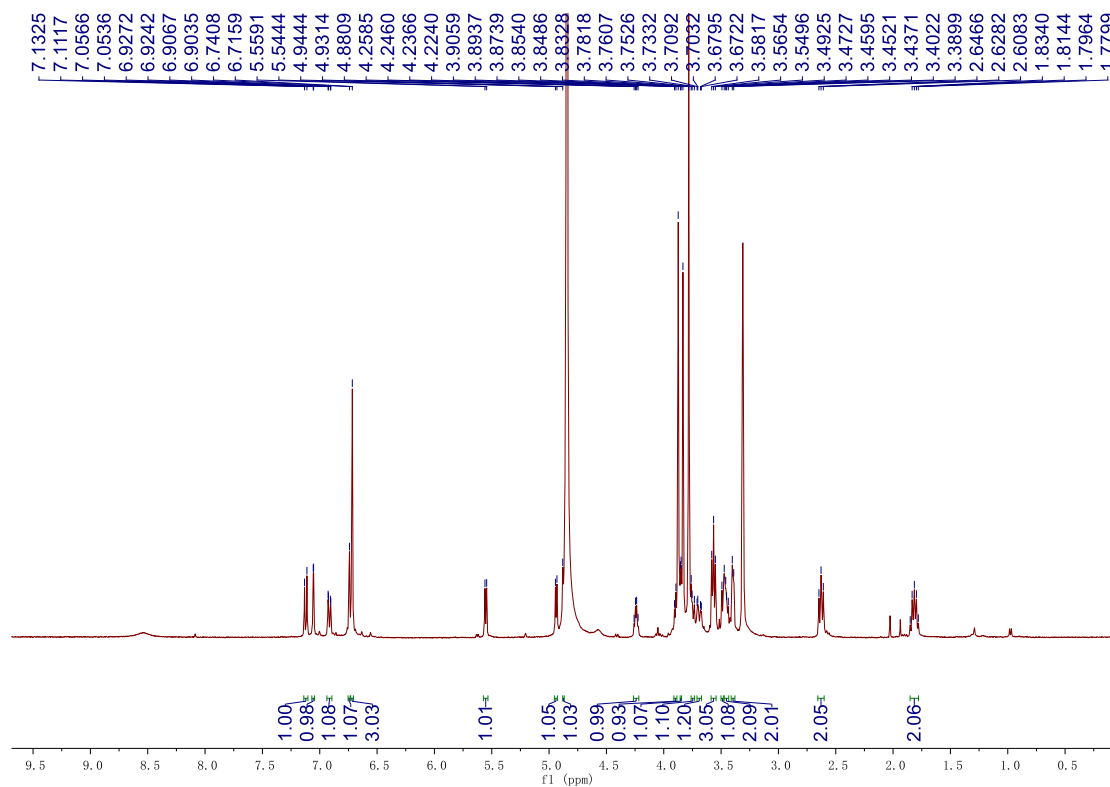

**Fig. S71  $^1\text{H}$  NMR spectrum of compound 9**

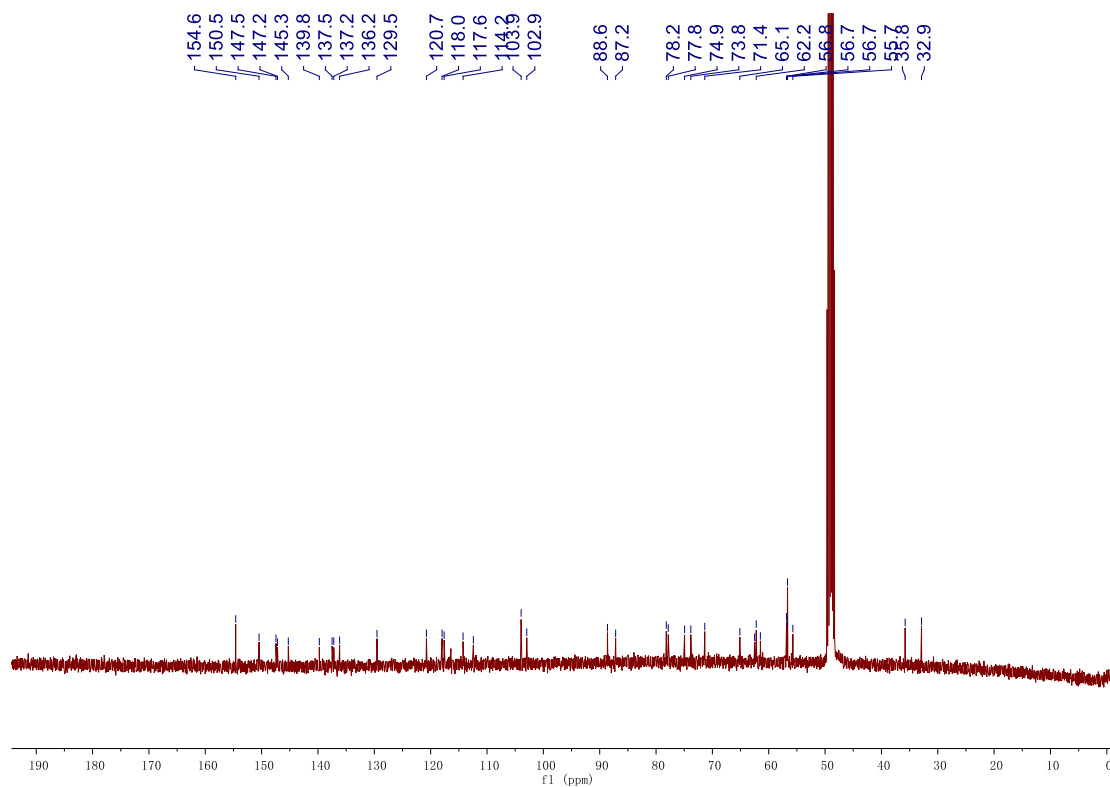

**Fig. S72  $^{13}\text{C}$  NMR spectrum of compound 9**

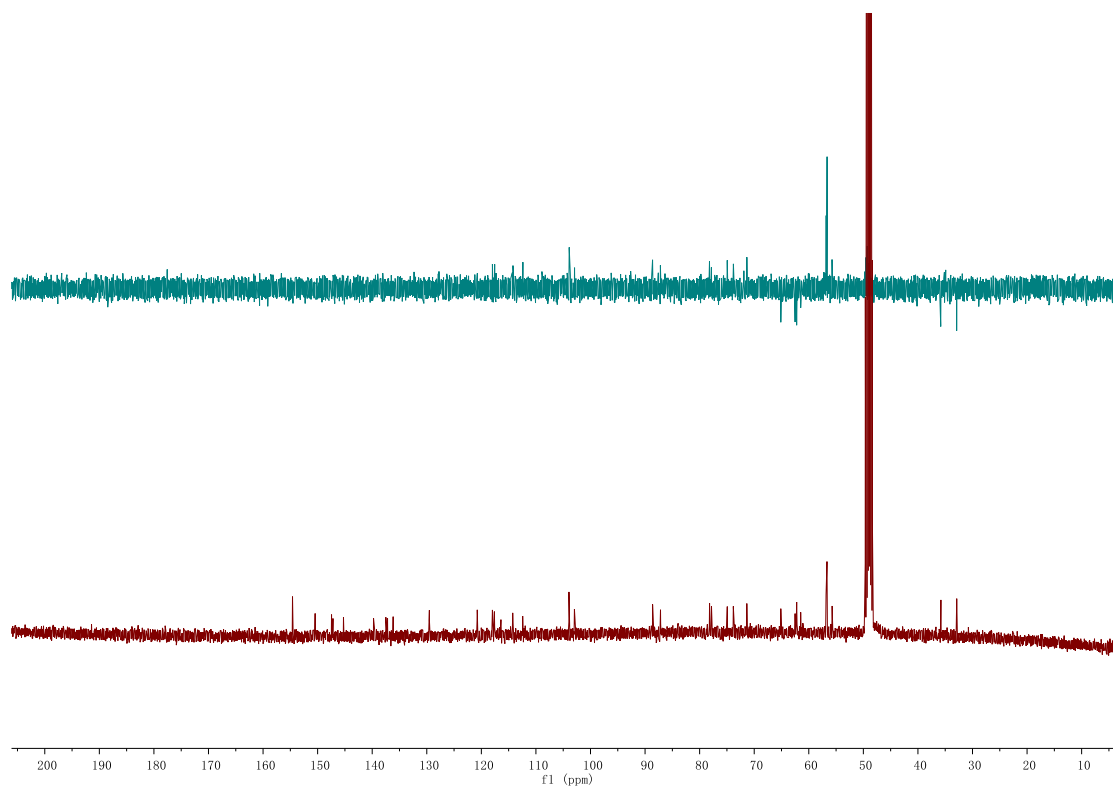

**Fig. S73  $^{13}\text{C}$ -NMR and DEPT 135 spectra of compound 9**

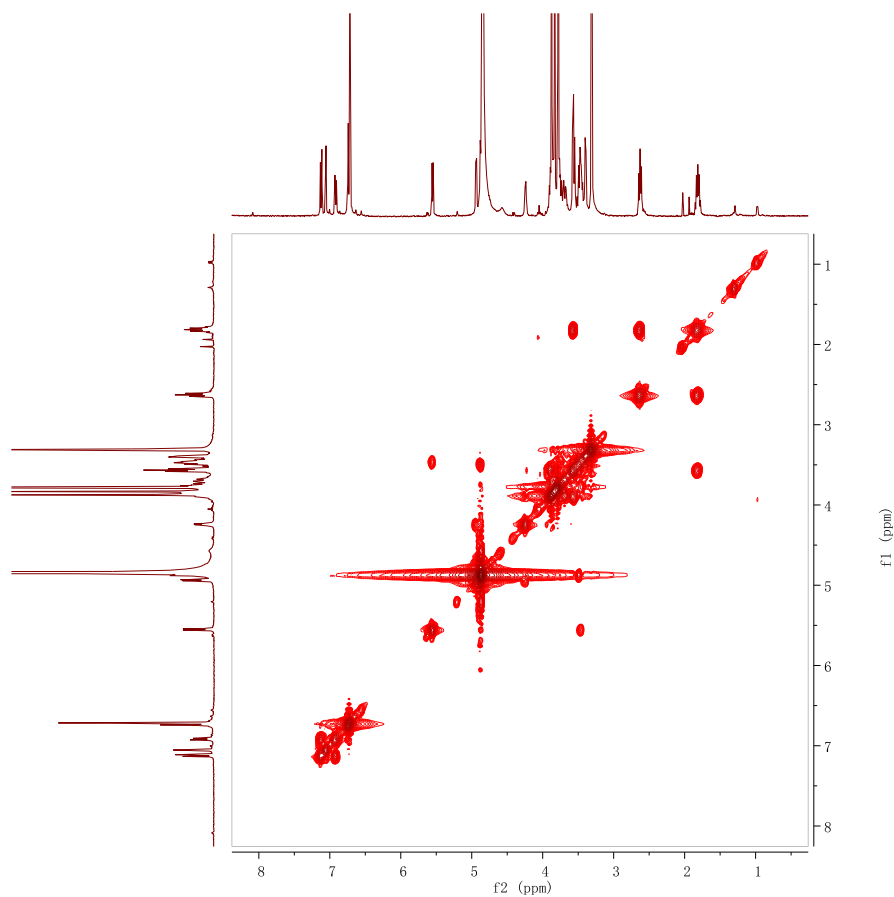

**Fig. S74  $^1\text{H}$ - $^1\text{H}$  COSY spectrum of compound 9**



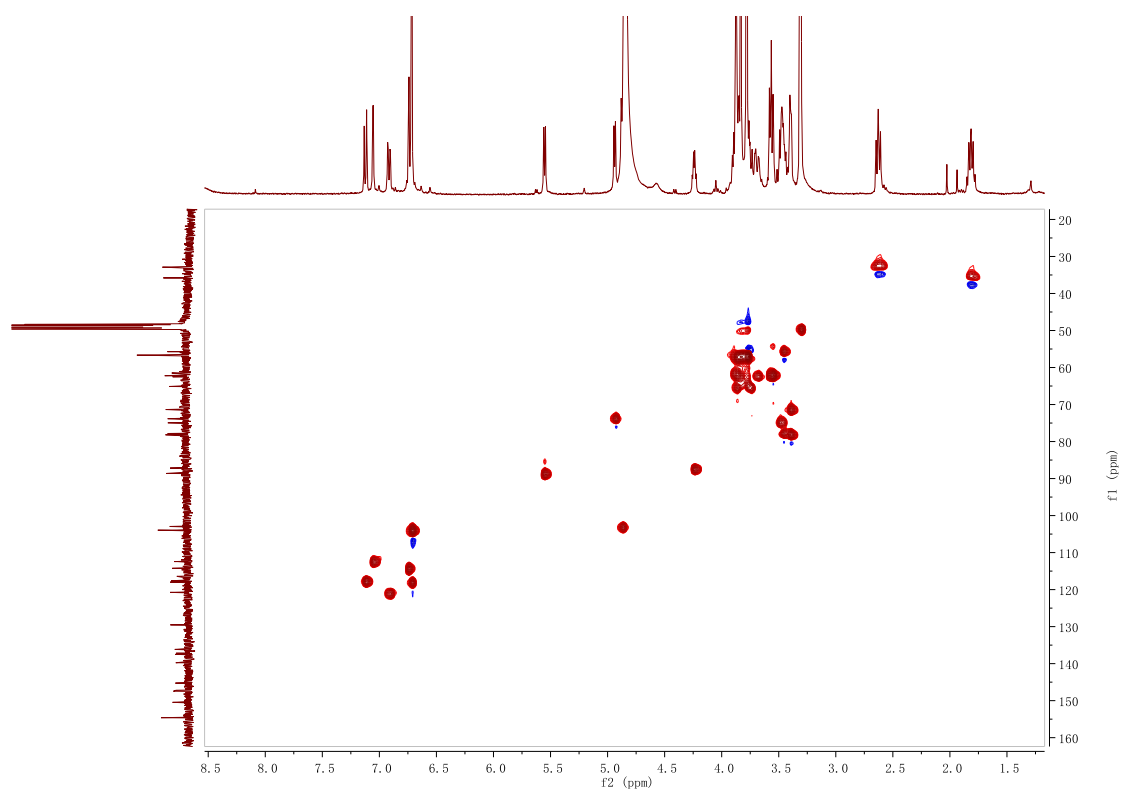

**Fig. S75 HSQC spectrum of compound 9**

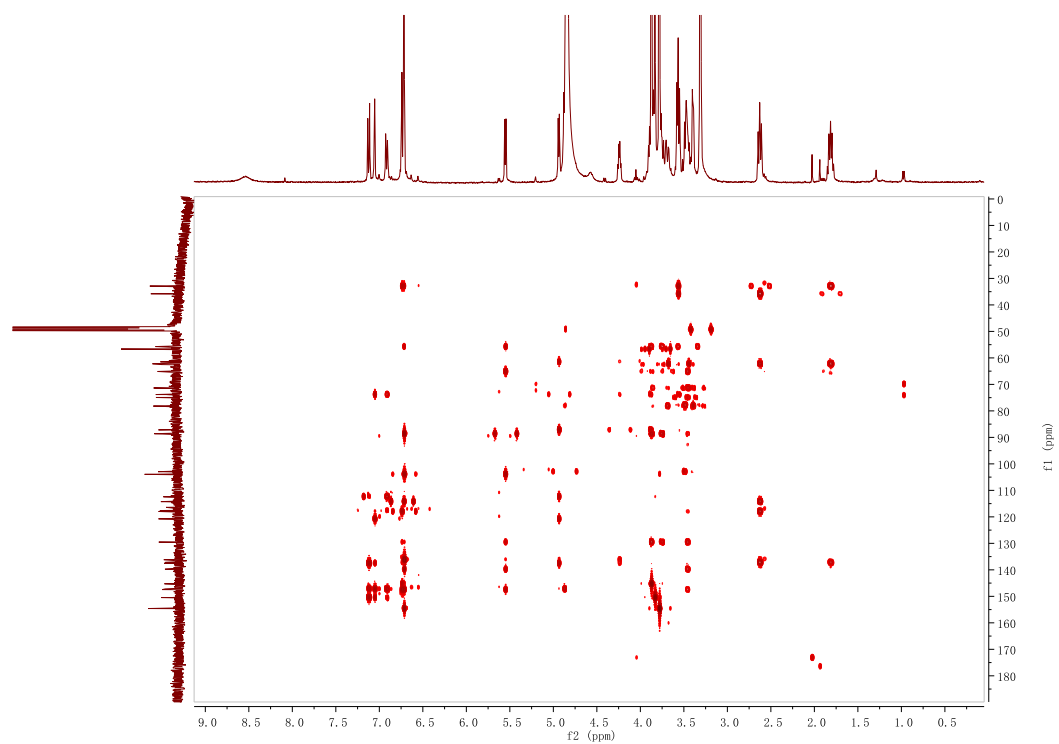

**Fig. S76 HMBC spectrum of compound 9**

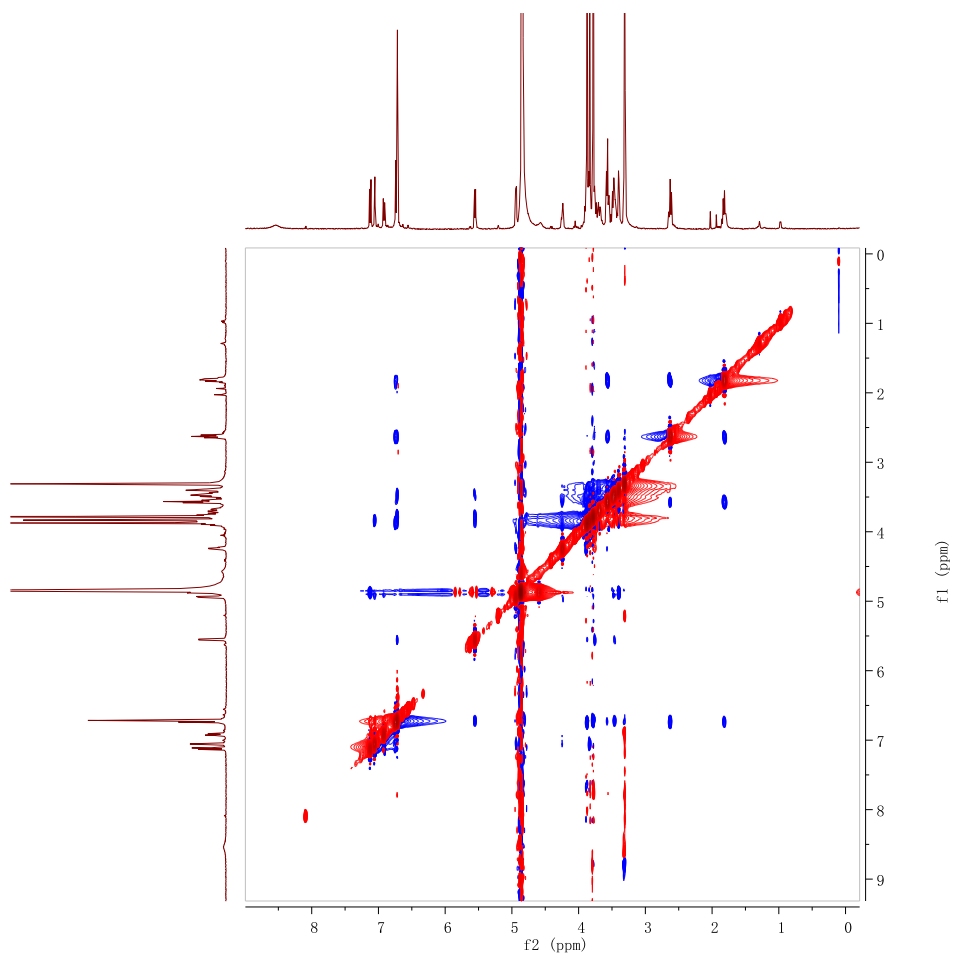

**Fig. S77** NOESY spectrum of compound **9**

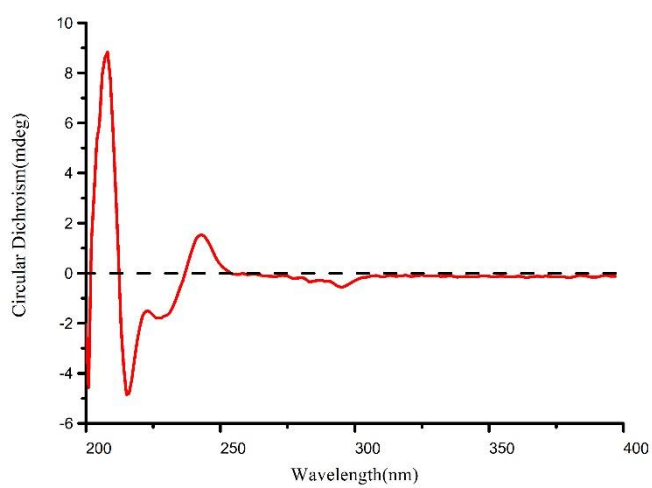

**Fig. S78** Experimental CD spectrum of compound **9**

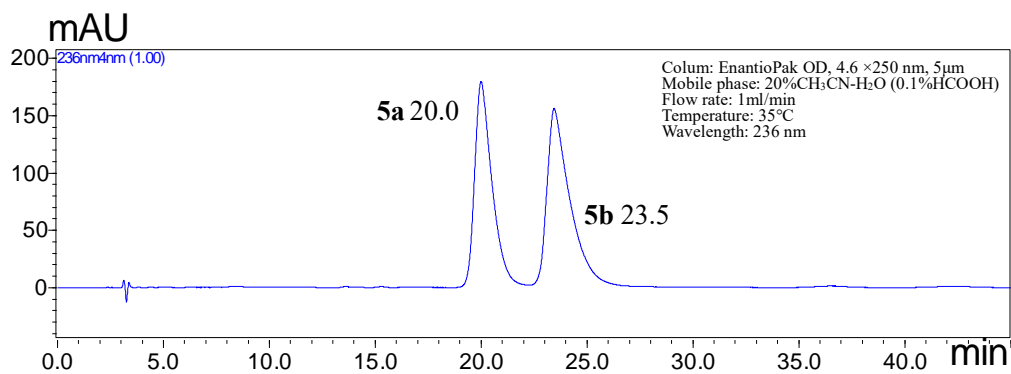

**Fig. S79 Chiral-phase HPLC analytical chromatograms of compound 5**

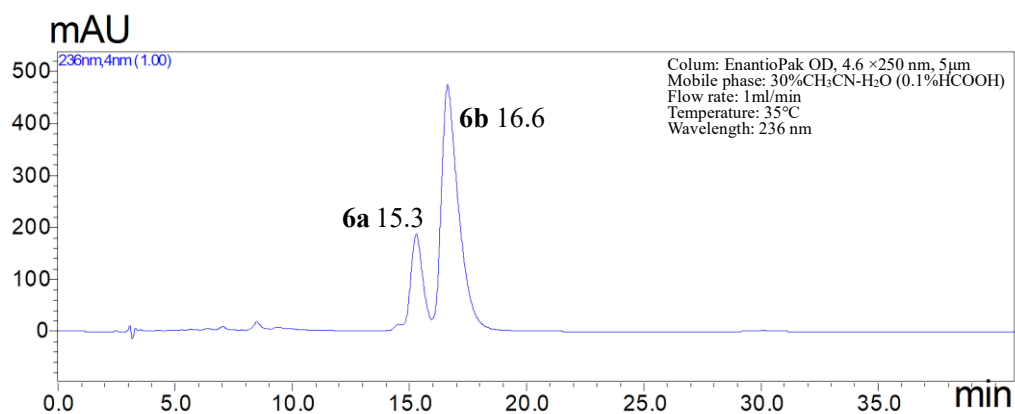

**Fig. S80 Chiral-phase HPLC analytical chromatograms of compound 6**

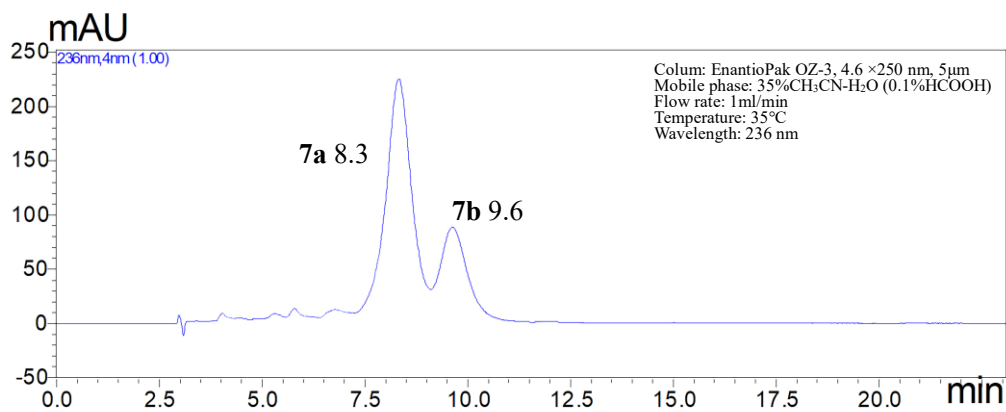

**Fig. S81 Chiral-phase HPLC analytical chromatograms of compound 7**

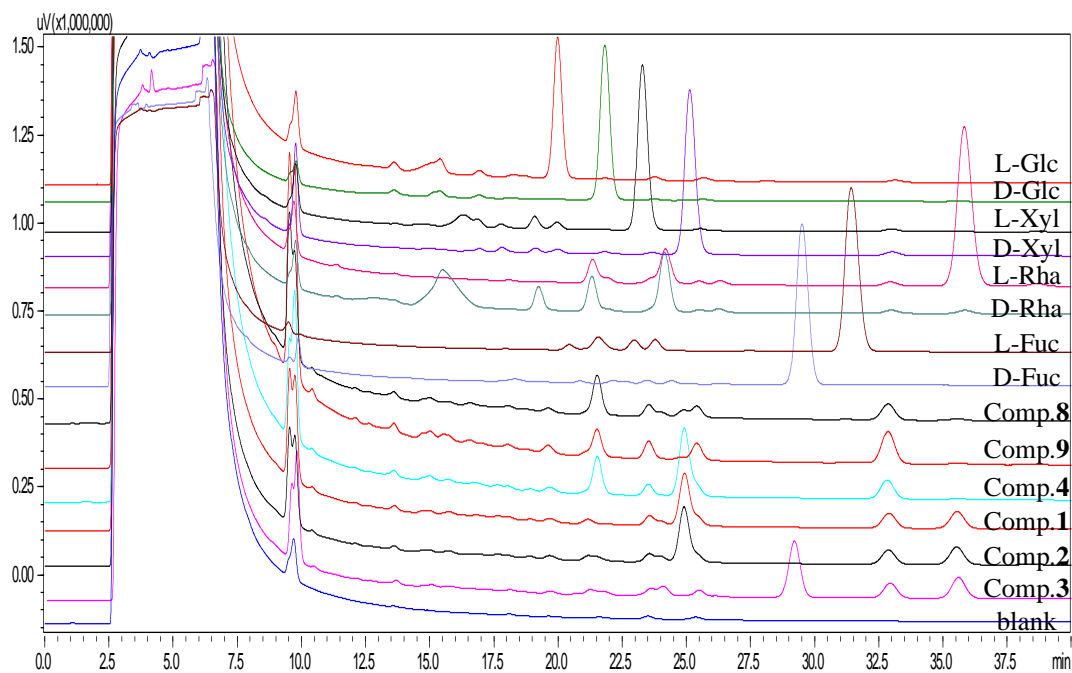

**Fig. S82 HPLC chromatograph for the derivative of compound 1-4, 8-9**

**RAW 264.7 PGE<sub>2</sub> assay**

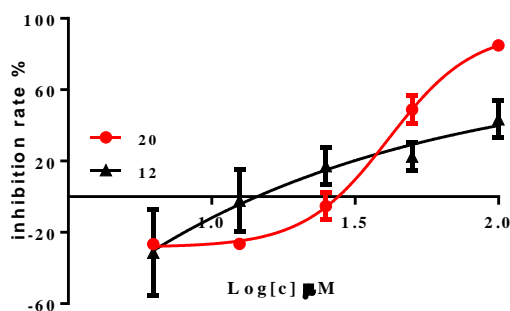

**Fig. S83 Effect of compounds 12 and 20 on PGE<sub>2</sub> production in LPS-stimulated**

**RAW264.7 cells**

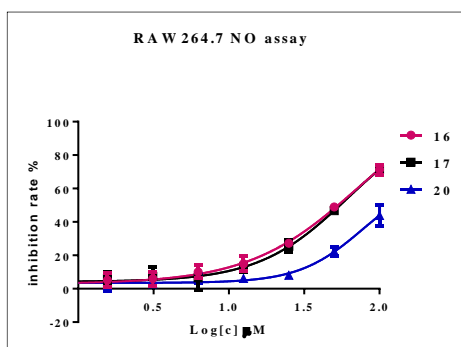

**Fig. S84 Effect of compounds 16,17 and 20 on NO production in LPS-stimulated**

**RAW264.7 cells**
